1           **A cell-autonomous role for primary cilia in long-range**  
2                                   **commissural axon guidance**

3  
4    **Alexandre Dumoulin<sup>1</sup>, Nicole H. Wilson<sup>1</sup>, Kerry L. Tucker<sup>2</sup> and Esther T. Stoeckli<sup>1</sup>**

5    <sup>1</sup> Department of Molecular Life Sciences and Neuroscience Center Zurich, University of Zurich,  
6    Winterthurerstrasse 190, 8057 Zurich, Switzerland

7    <sup>2</sup> University of New England, College of Osteopathic Medicine, Dept. of Biomedical Sciences,  
8    Center for Excellence in the Neurosciences, Biddeford, ME 04005 U.S.A.

9    corresponding author:        E.T.S. [esther.stoeckli@mls.uzh.ch](mailto:esther.stoeckli@mls.uzh.ch)

10   send correspondence to:       Esther T. Stoeckli ([esther.stoeckli@mls.uzh.ch](mailto:esther.stoeckli@mls.uzh.ch))

11

12   **Key words:**    Sonic hedgehog, axon guidance, commissural neurons, in ovo RNAi, primary  
13   cilium, midline crossing, *lft88*

14

15

16

## 17 **Summary**

18 *Ciliopathies are characterized by the absence or dysfunction of primary cilia. Despite the fact that*  
19 *cognitive impairments are a common feature of ciliopathies, how cilia dysfunction affects*  
20 *neuronal development has not been characterized in detail. Here, we show that the primary cilium*  
21 *is required cell-autonomously by neurons during neural circuit formation. In particular, the*  
22 *primary cilium is crucial during axonal pathfinding for the switch in responsiveness of axons at a*  
23 *choice point, or intermediate target. Utilizing animal models and in vivo, ex vivo, as well as in vitro*  
24 *experiments, we provide evidence for a critical role of the primary cilium in long-range axon*  
25 *guidance. The primary cilium on the cell body of commissural neurons transduces long-range*  
26 *guidance signals sensed by growth cones navigating an intermediate target. In extension of our*  
27 *finding that Shh is required for the rostral turn of post-crossing commissural axons, we show here*  
28 *that the cilium is required for a transcriptional change of axon guidance receptors, which in turn*  
29 *mediate the repulsive response to floorplate-derived Shh shown by post-crossing commissural*  
30 *axons.*

31

## 32 **Introduction**

33 The primary cilium is a non-motile protrusion that localizes to the cell soma. It works as a signaling  
34 hub involved in key developmental processes, such as survival, proliferation, differentiation,  
35 polarization, and migration of cells (Goetz and Anderson, 2010). Mutations in genes that encode  
36 proteins required for primary cilia formation, maintenance, or function have a dramatic impact  
37 in human, leading to a wide spectrum of disorders, classified as ciliopathies (Reiter and Leroux,  
38 2017). Patients with mutations in ciliary genes have a broad range of symptoms, including kidney

39 and liver problems, limb malformations, and very often cognitive impairments (Reiter and  
40 Leroux, 2017; Valente et al., 2014). In some types of ciliopathies, like Joubert or Bardet–Biedl  
41 syndromes, the brain of patients is structurally impaired (Valente et al., 2014). For instance,  
42 axonal tracts in Joubert syndrome patients were shown to be aberrantly formed suggesting  
43 abnormal neural circuit formation and potentially axon guidance defects (Sattar and Gleeson,  
44 2011). Therefore, we used animal models to better understand the etiology of these disorders  
45 by analyzing the role of the primary cilium during neural circuit formation.

46 Commissural dl1 neurons of the spinal cord have provided an informative model to study  
47 molecular mechanisms of neural circuit formation. Their axons extend ventrally from the dorsal  
48 spinal cord and cross the floorplate, the ventral midline, before turning anteriorly along the  
49 longitudinal axis. Many guidance cues for commissural axons have been identified (Chédotal,  
50 2011; de Ramon Francàs et al., 2017; Nawabi and Castellani, 2011; Stoeckli, 2018), including Sonic  
51 hedgehog (Shh), which plays multiple roles (Zuñiga and Stoeckli, 2017). While pre-crossing axons  
52 are attracted by floorplate-derived Shh (Charron et al., 2003), axons at the midline switch their  
53 responsiveness to Shh, as post-crossing axons are repelled by Shh (Bourikas et al., 2005; Wilson  
54 and Stoeckli, 2013; Yam et al., 2012).

55 We have previously shown that a receptor switch for Shh is responsible for the distinct axonal  
56 behaviors (Bourikas et al., 2005; Wilson and Stoeckli, 2013; Zuñiga and Stoeckli, 2017). Boc  
57 receptors transduce an attractive response to Shh in pre-crossing axons (Okada et al., 2006) via  
58 transcription-independent signaling (Yam et al., 2009). The transient expression of Hedgehog  
59 interacting protein (Hhip) in commissural neurons, which is required for axons to turn rostrally  
60 into the longitudinal axis (Bourikas et al., 2005), is triggered by Shh itself, via a Glypican1-

61 dependent transcriptional pathway (Wilson and Stoeckli, 2013). In turn, the presence of Hhip in  
62 the growth cone modifies the response to Shh, leading to repulsion of post-crossing axons. Thus,  
63 commissural axons encountering high levels of Shh in the floorplate might activate a  
64 transcription-dependent signaling pathway. This prompted us to test the requirement of the  
65 primary cilium for transcription-dependent Shh signaling during axon guidance, as this was  
66 shown previously for cell differentiation and patterning (Bangs and Anderson, 2017).

67 In recent years, the primary cilium has emerged as a critical cellular appendage for transcriptional  
68 response to Shh (Nozawa et al., 2013). Binding of Shh to Patched1 (Ptc1) promotes translocation  
69 of the Shh signaling effector Smoothed (Smo) to the cilium, where it activates Gli transcription  
70 factors (Corbit et al., 2005). In this model, ciliary function is essential for the transcriptional  
71 response to Shh. However, in axon guidance, Shh signaling was shown to be transcription-  
72 independent (Yam et al., 2009). Similarly, transcription-independent signaling was implicated in  
73 cell migration (Bijlsma et al., 2007; Brennan et al., 2012). Interestingly, the subcellular localization  
74 of Smo determines the differential responses to Shh. While Smo in the cilium activates Gli  
75 transcription factors to induce gene expression, Smo located outside the cilium favors the  
76 activation of chemotactic responses (Bijlsma et al., 2012).

77 Based on these findings and based on our recent results implicating the Joubert syndrome-  
78 related gene C5ORF42 (also termed CPLANE1 or JBTS17) in axon guidance in the central nervous  
79 system (CNS) (Asadollahi et al., 2018), we tested whether primary cilia were required for Shh-  
80 dependent commissural axon guidance. If attractive Shh signaling occurred via a transcription-  
81 independent pathway and the post-crossing repulsive response was triggered by cell-intrinsic  
82 mechanisms (as proposed by Yam et al., 2012), one would predict that cilia would not be required

83 for commissural axon pathfinding. On the other hand, if floorplate-derived Shh activated the  
84 transcription of guidance genes in commissural neurons, then functional cilia might be necessary.  
85 To test these possibilities, we examined commissural axon guidance in a mouse model in which  
86 ciliary function is perturbed, and refined and extended these analyses in chicken embryos, where  
87 we could silence ciliary genes in a spatiotemporally precisely controlled manner.  
88 Taken together, our studies indicate that primary cilia are required for commissural axon  
89 guidance in a cell-autonomous manner, allowing for a transcriptional switch in responsiveness to  
90 Shh. Our data support a model of a signaling cascade triggered at the growth cone of axons  
91 crossing the ventral midline of the CNS that involves retrograde transport of Shh to the soma.  
92 There, the signal is transduced at the primary cilium for finally inducing the transcription and  
93 expression of Hhip, the Shh receptor on post-crossing axons. These data provide evidence for a  
94 long-range axon guidance mechanism involving the primary cilium as a critical signaling  
95 component allowing axons to correctly navigate in the developing CNS.

96

97

98 **Results**

99

100 **Commissural neurons carry a primary cilium *in vivo* before, during, and after their axons cross**  
101 **the midline of the central nervous system**

102 We chose the dorsally localized commissural dl1 interneurons in the developing spinal cord as an  
103 axon guidance model. These commissural neurons provide a very accessible neuronal population  
104 to investigate molecular mechanisms of axon guidance, as they have a very stereotypical  
105 trajectory towards and across the ventral midline of the spinal cord. Their axons approach the  
106 ventral midline at the floorplate level, cross it, exit it, and turn rostrally towards the brain  
107 (Stoeckli, 2018).

108 We first asked whether dl1 neurons carried a primary cilium during the time window of axon  
109 pathfinding. Primary cilia were found on the dl1 subpopulation of commissural neurons in both  
110 chicken and mouse embryos (Fig. 1). We used *in ovo* electroporation of a plasmid for dl1 neuron-  
111 specific labeling (Wilson and Stoeckli, 2011) together with immunostaining of dl1 neuron nuclei  
112 (Lhx2 transcription factor) and primary cilia (Arl13b) to reveal the presence of primary cilia at  
113 different stages and to visualize the location of the dl1 axon tips at these time points (Fig. 1A-L).  
114 Arl13b-positive cilia were found on dl1 commissural neuron cell bodies in the chicken spinal cord  
115 during initial axon growth (Hamburger and Hamilton stage (HH)20), pre-crossing axonal  
116 elongation (HH22), midline crossing and exiting (HH24), and during extension of post-crossing  
117 axons along the contralateral floorplate border (HH26, white arrows point to cilia and white  
118 arrowheads to dl1 growth cones, respectively, Fig. 1A-L).

119

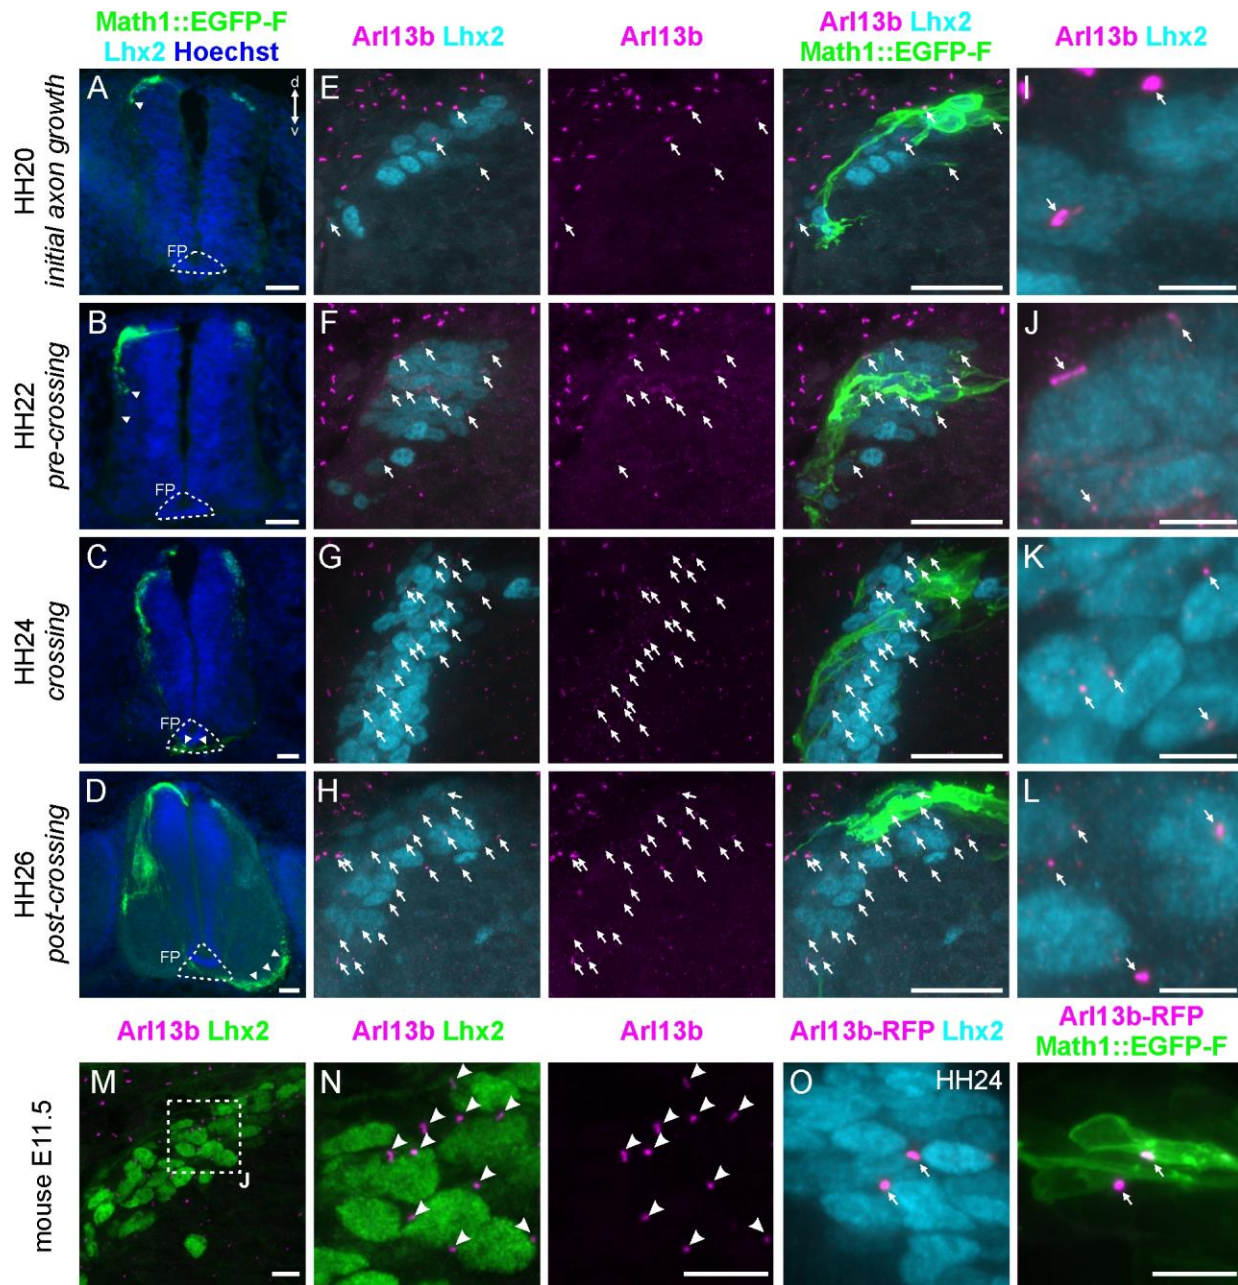

120

121 **Figure 1. The dl1 commissural neurons carry a primary cilium at different time points of their**  
 122 **development in vivo.**

123 (A-D) Transverse sections of chicken embryos in which the *Math1::EGFP-F* plasmid (green) was  
 124 electroporated unilaterally to label *dl1* neurons at HH17-18. Embryos were sacrificed at different  
 125 time points. At HH20, *dl1* axons were starting to extend an axon (A). At HH22, they were growing  
 126 ventrally (B), at HH24, they were crossing the floorplate (C), and at HH26, post-crossing axons  
 127 were localized in the contralateral ventral funiculus (D). Arrowheads show where *dl1* axonal



128 *growth cones localized at the different time points. Lhx2 was used as a marker for dl1 nuclei (cyan)*  
129 *and section were counterstained with Hoechst to stain all nuclei (blue). (E-H) High magnification*  
130 *pictures of the dl1 neuron area of the same spinal cords depicted in (A-D) showing Lhx2-positive*  
131 *dl1 nuclei (cyan) co-stained with the primary cilium marker Arl13b (magenta) and GFP (dl1 neuron*  
132 *reporter, green). These neurons carried a primary cilium (arrows) on their soma throughout*  
133 *stages HH20 to HH26. (I-L) Cropped pictures of an area shown in (E-H). (M-N) Similar observations*  
134 *were made in E11.5 mouse embryos at the time, when dl1 axons were crossing/exiting the midline*  
135 *area with Lhx2-positive dl1 neurons (green) carrying Arl13b-positive primary cilia (red,*  
136 *arrowheads). (O) Ciliation of dl1 neurons was confirmed by co-electroporating Arl13 fused to RFP*  
137 *(Arl13b-RFP) and Math1::EGFP-F in vivo at HH17-18 and co-staining of RFP (magenta), GFP*  
138 *(green) and Lhx2 (cyan) on HH24 spinal cord sections (white arrows). FP, floorplate; d, dorsal; v,*  
139 *ventral. Scale bars: 50  $\mu$ m (A-D), 25  $\mu$ m (E-H), 5  $\mu$ m (I-L) and 10  $\mu$ m (M-O).*

140

141

142 These data were in line with previous reports in the chicken spinal cord with newly differentiated  
143 interneurons *in vivo* and cultured commissural neurons, respectively (Toro-Tapia and Das, 2020;  
144 Yusifov et al., 2021). Moreover, the ciliation of dl1 neurons in the chicken was confirmed by  
145 immunostaining for adenylate cyclase III (ACIII), a known neuronal primary cilia marker (Fig. S1)  
146 (Casparly et al., 2016; Ou et al., 2009). Similarly, Arl13b-positive cilia were found on embryonic  
147 (E11.5) mouse dl1 neurons at a stage when their axons were crossing and exiting the ventral  
148 midline of the CNS (white arrowheads, Fig. 1M,N). In addition, we also overexpressed Arl13b-RFP  
149 *in vivo* to visualize primary cilia in the chicken spinal cord together with dl1-specific GFP  
150 expression and could confirm that these neurons carried a primary cilium at the time when their  
151 axons were crossing the floorplate by staining of RFP (white arrows, Fig. 1O).

152



153 Taken together, our results showed that dl1 neurons carry a primary cilium before their axons  
154 contact the floorplate, during floorplate crossing, and after their axons turn rostral into the  
155 longitudinal axis. Therefore, the presence of primary cilia on dl1 neurons is compatible with a  
156 role during axon guidance at a choice point.

157

### 158 **Commissural axon guidance is perturbed in the *cobblestone* mutant**

159 To study the role of cilia and Shh signaling in commissural axon guidance, we examined a mouse  
160 mutant in which ciliary function is perturbed. *Cobblestone* (*cbs*) mice are hypomorphic for the  
161 intraflagellar transport protein-88 (*Ift88*), as they express *Ift88* mRNA and protein at only 25% of  
162 the levels of wildtype (WT) embryos (Willaredt et al., 2008). *Ift88* is a component of the IFTB  
163 anterograde transport complex of the cilium, which is required for formation and maintenance  
164 of cilia and transcription-dependent Shh signaling (Bangs and Anderson, 2017; Huangfu and  
165 Anderson, 2005; Liu et al., 2005). Although *cbs* embryos still possess cilia, albeit in reduced  
166 numbers, they phenocopy perturbations in Shh pathway components, suggesting that the  
167 existing cilia do not adequately mediate Shh signaling (Gazea et al., 2016; Willaredt et al., 2008).  
168 We found that *cbs* homozygous embryos had a reduced number of cilia on dl1 neurons compared  
169 to WT littermates using co-staining of the cilia marker *Arl13b* and the dl1 neuron marker *Lhx2*  
170 (Fig. 2A-D). Moreover, we found that *Shh* mRNA and protein were reduced or absent in the *cbs*  
171 floorplate (Fig. 2E and Fig. S2). Hence, we used *cbs* mice to assess the effects of reduced Shh  
172 levels and/or compromised transcription-dependent signaling on commissural axon guidance. In  
173 wildtype mice, as previously described in rat (Yam et al., 2012) and chick (Bourikas et al., 2005),

174 we found that *Shh* mRNA was expressed in a posterior<sup>high</sup> to anterior<sup>low</sup> gradient along the  
 175 floorplate (Fig. S2A-D).  
 176

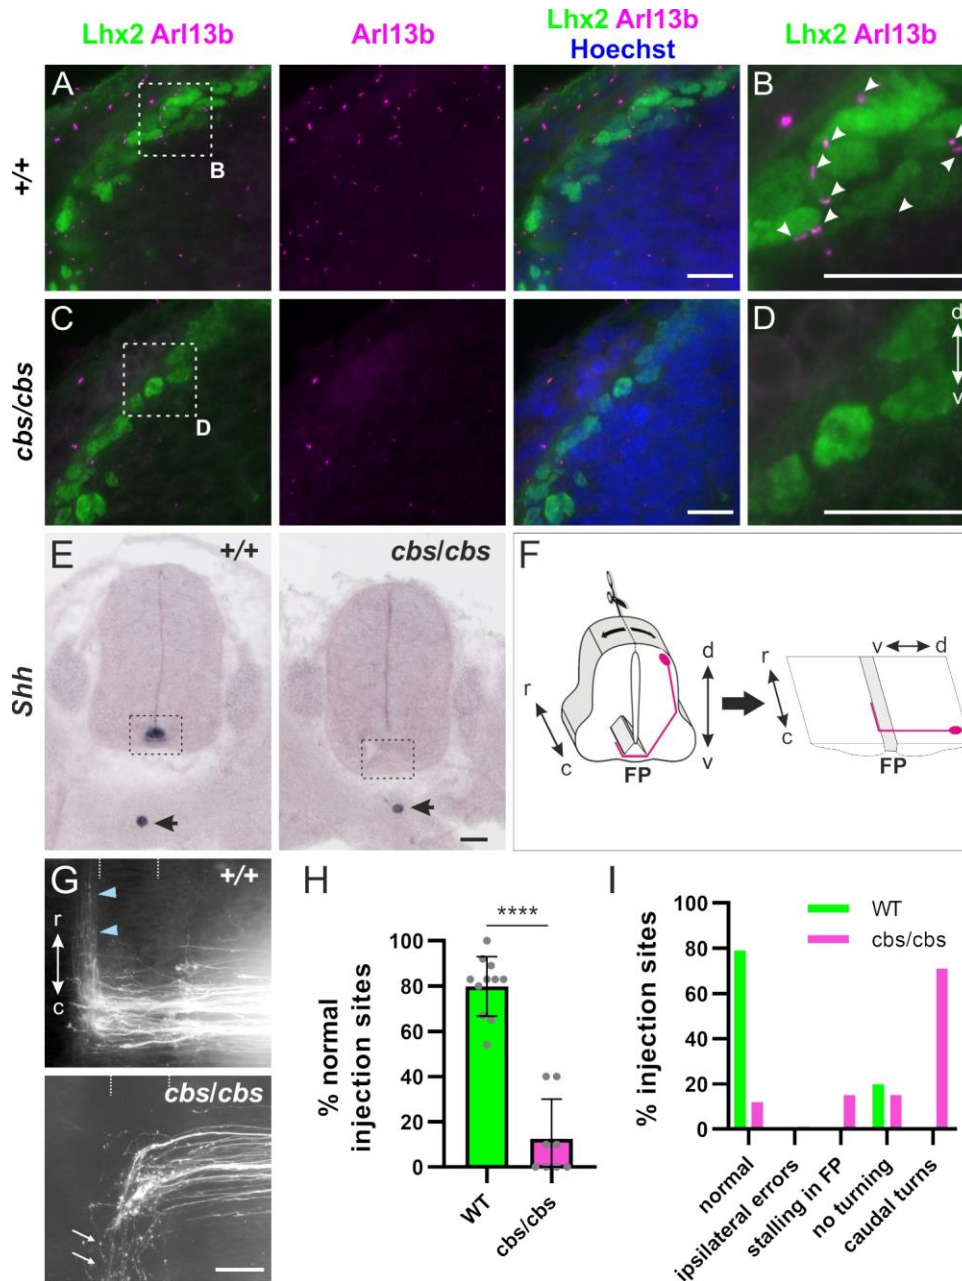

177

178

179 **Figure 2. Cobblestone (*cbs*) mice display defects in post-crossing commissural axon guidance.**

180 (A-D) Spinal cord transverse sections of E11.5 mouse embryos were stained for the primary cilia  
181 marker *Arl13b* (magenta), co-stained for the *dl1* neuron marker *Lhx2* (green), and counterstained  
182 with Hoechst (blue). While many primary cilia were present in the area of *dl1* somas of wild-type  
183 embryos (+/+), white arrowheads, B), very few to none were detected in this area in homozygous  
184 *cobblestone* (*cbs/cbs*) littermates (D). (E) In situ hybridization on E12.5 spinal cord transverse  
185 sections revealed that *Shh* was absent from the floorplate (dashed rectangle) in *cbs/cbs* embryos,  
186 whereas it was still expressed in the notochord (black arrow). (F) Schematic depicting the open-  
187 book preparation of embryonic spinal cords allowing for the visualization of *dl1* axon (magenta)  
188 projections at the ventral midline, the floorplate. (G) Examples of Dil tracing of *dl1* axons in an  
189 open-book preparation of a E12.5 spinal cord taken from a wild-type embryo, showing a normal  
190 rostral turning phenotype (blue arrowheads) and aberrant phenotypes seen in *cbs/cbs* embryos,  
191 mostly caudal turns (white arrows). (H) Quantification of axon guidance defects in *cbs/cbs*  
192 embryos compared to wild-type littermates (unpaired T-test).  $N(\text{embryos}) = 11$  (WT) and 8  
193 (*cbs/cbs*);  $n(\text{injection sites}) = 118$  (WT) and 52 (*cbs/cbs*). Error bars represent standard deviation.  
194  $p < 0.0001$  (\*\*\*\*). *d*, dorsal; *v*, ventral; *r*, rostral; *c*, caudal; FP, floorplate. Scale bars: 20  $\mu\text{m}$  (A-D)  
195 and 50  $\mu\text{m}$  (E and G). Source data and statistics are available in Source Data spreadsheet.

196

197

198 We assessed *dl1* axon pathfinding by tracing axons with the lipophilic dye Dil in open-book  
199 preparations of spinal cords taken from E12.5 embryos (Fig. 2F-I). In WT or heterozygous  
200 littermates, the majority of Dil-traced axonal trajectories displayed the normal phenotype: at  $80$   
201  $\pm 13\%$  (mean  $\pm$  standard deviation) of the Dil injection sites, axons crossed the floorplate and  
202 turned rostrally along the contralateral floorplate border (blue arrowheads, Fig 2G,H). However,  
203 in *cbs* mice, axons at only  $13 \pm 18\%$  of the Dil injection sites (mean  $\pm$  standard deviation) showed  
204 normal behavior. Upon reaching the exit site of the floorplate, most of the axons turned caudally

205 instead of rostrally in *cbs* mice (Fig. 2G-I). Thus, perturbation of *Ift88* levels caused aberrant  
206 commissural axon guidance.

207

### 208 ***Cbs* mice exhibit defects in ventral spinal cord patterning**

209 Because transcription-dependent Shh signaling is required for spinal cord patterning, the  
210 observed axon guidance defects could also be caused indirectly through changes in floorplate  
211 induction and aberrant cell differentiation. Thus, we assessed whether spinal cord patterning was  
212 affected in *cbs* mice (Fig. S3). Indeed, this is what we found. At E10.5, some *Islet1*-positive cells  
213 erroneously invaded the ventral midline (white arrowhead, Fig.S3). The characteristic distribution  
214 of *Islet1*-positive motoneurons was not seen in *cbs* mice. However, by E12.5, *Islet1* staining  
215 resembled WT. *Nkx2.2*, a Shh target that is only induced by high levels of Shh, was strongly  
216 reduced in *cbs* embryos. The few *Nkx2.2*-positive cells were disorganized compared to WT  
217 embryos (yellow arrows, Fig. S3). Both Shh and the floorplate marker *HNF3 $\beta$*  were absent from  
218 the *cbs* spinal cord (white arrows, Fig. S3). In contrast, dorsal markers, like *Pax3*, were unaffected  
219 in *cbs* mice at E10.5 and E12.5. Importantly, the differentiation of *dI1* neurons still occurred  
220 normally in *cbs* mice, as *Lhx2*-positive differentiated interneurons could be detected (Fig. 2A-D).  
221 Moreover, these commissural *dI1* neurons extended their axons normally towards the ventral  
222 midline as visualized by *Axonin-1* staining (Fig. S3).

223 Taken together, the patterning analysis revealed that the dorsal *cbs* spinal cord was correctly  
224 specified, while in the ventral spinal cord, the floorplate and its neighboring cell types were mis-  
225 specified.

226 As the floorplate is the intermediate target for commissural axons, its improper differentiation  
227 /reduction in *cbs* mice might contribute to the observed axon guidance errors. Indeed, *Gli2*<sup>-/-</sup>  
228 mice, which lack a floorplate, display similar guidance errors to those reported here (Matise et  
229 al., 1999; Yam et al., 2012). To determine whether the axon guidance anomalies in *cbs* mice arose  
230 only secondarily to the lack of a defined floorplate, or whether *Ift88* or ciliary function might also  
231 be directly required in commissural neurons for correct guidance, we next turned to *in ovo* RNAi  
232 experiments, in which we could avoid the early morphological effects of diminished *Ift88*  
233 function.

234

235 **Temporally controlled loss of the IFTB proteins *Ift88* and *Ift52* in the chicken spinal cord leads**  
236 **to commissural axon guidance defects without affecting spinal cord patterning**

237 Using *in ovo RNAi* allowed us to precisely control *Ift88* knockdown in such a way that floorplate  
238 development was not affected. *Ift88* was expressed throughout the chick neural tube during  
239 commissural pathfinding (HH18-26) (Fig. S4A). Unilateral electroporation of long double-  
240 stranded RNA (dsRNA) derived from *Ift88* was performed at HH17-18 to knockdown *Ift88* in one  
241 half of the neural tube only after early spinal cord patterning was completed, but just prior to  
242 commissural axon outgrowth. The efficiency and specificity of the knockdown using dsRNA was  
243 verified using a reporter assay *in vitro* (Fig. S5). After this temporally controlled silencing of *Ift88*,  
244 floorplate morphology and HNF3 $\beta$  expression were normal (Fig. S4B) and neural tube patterning  
245 was not affected, as this is completed before our experimental knockdown of *Ift88* (Fig. S4C).

246

247

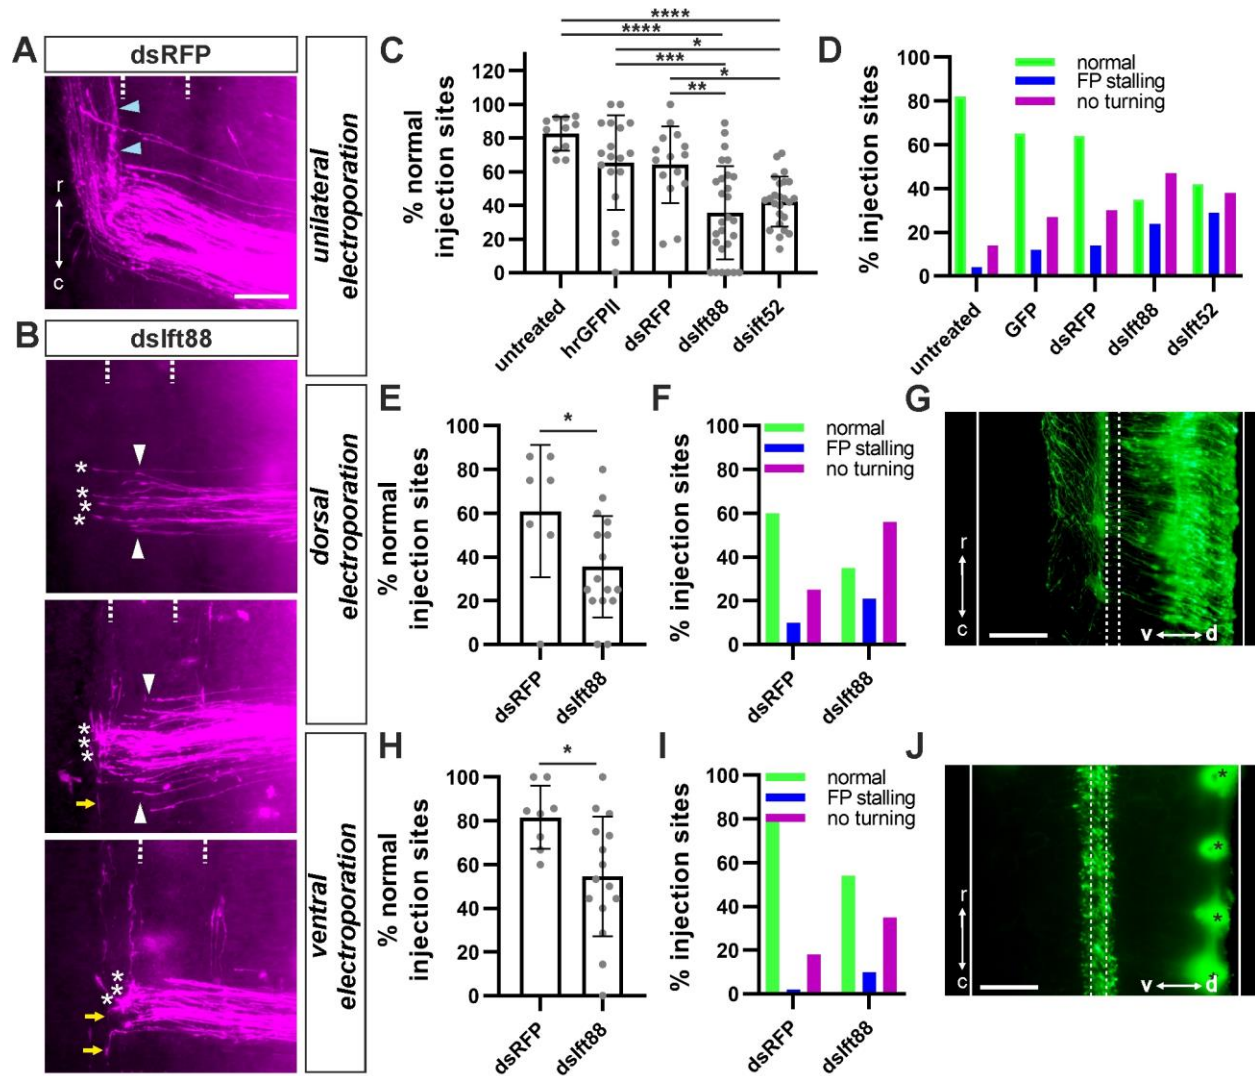

248

249 **Figure 3. The IFTB proteins Ift88 and Ift52 are required for commissural axon guidance.**

250 (A) Representative example of Dil-traced dl1 axons in an open-book preparation of a dsRFP-  
 251 injected control embryo, showing normal rostral turning (blue arrowheads). (B) Ift88 knockdown  
 252 with dsIFT88 induced aberrant phenotypes at the CNS midline with most of the axons being unable  
 253 to turn rostrally and instead stalling (white asterisks) or turning caudally (yellow arrows) at the  
 254 floorplate exit site. Moreover, some axons stalled in the floorplate area (white arrowheads). (C,D)  
 255 Quantification of axon guidance phenotypes at the spinal cord ventral midline after unilateral  
 256 electroporation of the spinal cord. One-way ANOVA with Tukey's multiple comparisons test.  
 257 N(embryos)= 11 (untreated), 18 (hrGFPII), 15 (dsRFP), 27 (dsIFT88), 24 (dsIFT52); n(injection  
 258 sites)= 135 (untreated), 178 (hrGFPII), 141 (dsRFP), 251 (dsIFT88), 323 (dsIFT52). (E,F) Dorsal



259 *electroporation of *dsIft88*, targeting commissural neurons, induced similar aberrant phenotypes*  
260 *as seen after unilateral electroporation. Unpaired T-test. N(embryos)= 7 (*dsRFP*) and 16 (*dsIft88*);*  
261 *n(injection sites)= 49 (*dsRFP*) and 90 (*dsIft88*). (G) Dorsal targeting was confirmed by expression*  
262 *of co-electroporated *hrGFPII* (green) in open-book preparations. (H,I) Ventral electroporation of*  
263 **dsIft88* targeting the ventral midline also affected *dl1* commissural axon guidance. Unpaired T-*  
264 *test. N(embryos)= 8 (*dsRFP*) and 15 (*dsIft88*); n(injection sites)= 63 (*dsRFP*) and 130 (*dsIft88*). (J)*  
265 *Ventral targeting was confirmed by expression of co-electroporated *hrGFPII* (green) in open-book*  
266 *preparations. Asterisks indicate *Dil* injection sites in this preparation (bleed-through*  
267 *fluorescence). Dashed lines represent the floorplate boundaries.  $p < 0.0001$  (\*\*\*\*),  $p < 0.001$  (\*\*\*),*  
268  *$p < 0.01$  (\*\*),  $p < 0.05$  (\*) and  $p > 0.05$  (ns). r, rostral; c, caudal; d, dorsal; v, ventral; FP, floorplate.*  
269 *Source data and statistics are available in Source Data spreadsheet.*

270

271

272 Silencing *Ift88* in this temporally controlled manner still caused axons to stall in the floorplate or  
273 at the contralateral floorplate border (Fig. 3A-B). Most of the axons failed to turn longitudinally,  
274 suggesting that *Ift88* is directly required for correct guidance of post-crossing axons (asterisks,  
275 Fig. 3B-D). At only  $36 \pm 28\%$  of the *Dil* injection sites (mean  $\pm$  standard deviation), *dl1* axons  
276 turned rostrally at floorplate exit (Fig. 3C). Importantly, embryos in which the neural tube was  
277 electroporated unilaterally with only a plasmid encoding GFP ( $65 \pm 28\%$  of rostral turning) or the  
278 plasmid together with dsRNA against RFP ( $64 \pm 15\%$  of rostral turning) did not show any  
279 significant defects in axon guidance compared to untreated embryos ( $82 \pm 10\%$  of rostral turning,  
280 mean  $\pm$  standard deviation). The majority of the axons turned rostrally at the contralateral  
281 floorplate border (blue arrowheads, Fig. 3A and Fig. 3C,D). In support of these findings, we  
282 observed similar phenotypes when we knocked down *Ift52*, another component of the IFTB  
283 complex that directly binds *Ift88* (Lucker et al., 2010). We found that axons behaved normally at



284 only  $42 \pm 15\%$  of the Dil injection sites (mean  $\pm$  standard deviation), with most of the axons  
285 showing post-crossing errors (Fig. 3C,D). Thus, *Ift88* deficiency directly contributes to axon  
286 guidance errors in the chicken spinal cord.

287

### 288 ***Ift88* is required in commissural neurons for correct axon guidance at the CNS midline**

289 To dissect the cell type-specific requirement for *Ift88*, we used targeted electroporation to  
290 knockdown *Ift88* either in the dorsal spinal cord (targeting primarily commissural neurons; Fig.  
291 3E,F and G) or in the ventral spinal cord (targeting the floorplate; Fig. 3H,I and J). The ventral  
292 downregulation of *Ift88* mildly affected commissural axon guidance ( $55 \pm 27\%$  of Dil sites with  
293 rostral turning) compared to the electroporation of dsRNA targeting RFP as a control ( $82 \pm 15\%$   
294 of Dil sites with rostral turning, mean  $\pm$  standard deviation, Fig. 3H,I). In contrast, dorsal targeting  
295 of *dsIft88* resulted in similar guidance defects to those observed after unilateral electroporation  
296 with most of the axons failing to turn rostrally ( $36 \pm 22\%$  of Dil sites with rostral turning) in the  
297 longitudinal axis compared to dsRFP control ( $61 \pm 30\%$  of Dil sites with rostral turning, mean  $\pm$   
298 standard deviation, Fig. 3E,F).

299 Together, the spatiotemporal knock-down of the ciliary gene *Ift88* indicated that *Ift88* was  
300 required cell-autonomously in commissural neurons for correct axon guidance and that this  
301 activity was distinct from its earlier role in floorplate morphogenesis and cell differentiation  
302 (Goetz and Anderson, 2010; Tasouri and Tucker, 2011). It also suggested that a functional primary  
303 cilium is required in commissural neurons for correct axon guidance at an intermediate target.

304

### 305 ***Ift88* is required for the transcriptional switch of Shh receptors in commissural neurons**

306 We previously identified a Shh-mediated transcriptional switch of axon guidance receptors as  
307 responsible for the change from attraction to repulsion between pre- and post-crossing  
308 commissural axons (Wilson and Stoeckli, 2013). This transcriptional switch, leading to the  
309 transient expression of the Shh receptor *Hhip*, is triggered by Shh itself via Glypican-1 (Wilson  
310 and Stoeckli, 2013). Interestingly, the phenotypes reported above after silencing *Ift88* were  
311 similar to those seen after the perturbation of Shh, Glypican-1, or *Hhip* function (Bourikas et al.,  
312 2005; Wilson and Stoeckli, 2013). Based on these results, we hypothesized that the axon  
313 misprojections observed after *Ift88* silencing could be caused by the absence of the transient  
314 expression of *Hhip* in dl1 neurons. To investigate this idea, we performed *in situ* hybridization for  
315 *Hhip* in HH25 spinal cord transverse sections after unilaterally silencing *Ift88 in vivo*. Indeed, when  
316 *Ift88* was unilaterally knocked down at HH18, *Hhip* signal intensity in the dl1 neurons located in  
317 dorsal spinal cord (white dashed circles, Fig. 4) at HH25 was lower on the electroporated side  
318 (Fig. 4B). As expected, the unilateral electroporation of a plasmid encoding a GFP protein alone  
319 (control) did not lead to a reduction of *Hhip* expression in dl1 neurons (white dashed circles, Fig.  
320 4A). Calculation of a normalized *Hhip* intensity ratio in dl1 neurons revealed that silencing *Ift88*  
321 significantly reduced the expression of *Hhip* by about 26% compared to the electroporated side  
322 with a ratio<sup>electro:control</sup> of  $0.74 \pm 0.19$  compared to  $1 \pm 0.14$  for the control sample (mean  $\pm$  standard  
323 deviation, Fig. 4C; N=5 embryos each,  $p < 0.05$ ). The reduction in *Hhip* expression can explain the  
324 failure of post-crossing commissural axons to turn rostrally (Bourikas et al., 2005; Wilson and  
325 Stoeckli, 2013).

326

327

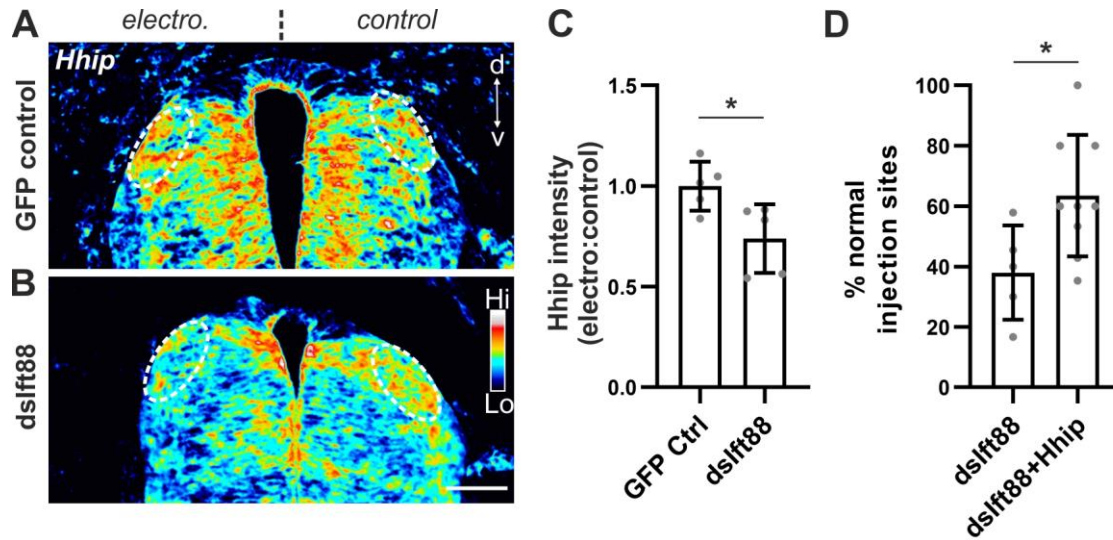

328

329 **Figure 4. *Ift88* is required for the transcription of *Hhip*, the *Shh* receptor for post-crossing**  
330 ***commissural axons.***

331 (A-B) Knockdown of *Ift88* at HH18 reduced *Hhip* mRNA expression in *dl1* neurons at HH25. (A)  
332 Heatmap images of in situ hybridization for *Hhip* in the spinal cord revealed no apparent change  
333 in *Hhip* mRNA in *dl1* neurons area (dashed ovals) when GFP was electroporated unilaterally. (B)  
334 However, co-electroporation of *dsIfft88* reduced *Hhip* mRNA expression in *dl1* neurons on the  
335 electroporated side. (C) Quantification of the average *Hhip* mRNA intensity ratio between  
336 electroporated and control side revealed a reduction of about 25% after *Ift88* knockdown  
337 compared to GFP control (unpaired T-test). N(embryos)=5 for each condition. (D) Axon guidance  
338 errors seen after downregulation of *Ift88* were rescued by expression of *Hhip*. The number of *Dil*  
339 injection sites with normal axonal trajectories were significantly increased by *Hhip* expression  
340 compared to *Ift88* loss of function and was rescued to a level similar to GFP controls (see Fig. 3C,  
341 unpaired T-test). N(embryos)= 5(*dsIfft88*) and 9(*dsIfft88+Hhip*); n(injection sites)= 62 (*dsIfft88*) and  
342 79 (*dsIfft88+Hhip*). Error bars represent standard deviation.  $p < 0.05$  (\*). *electro*, electroporated; *d*,  
343 dorsal; *v*, ventral; *Hi*, high; *Lo*, low. Source data and statistics are available in Source Data  
344 spreadsheet.

345

346

347 To provide evidence further supporting our model that *Ift88* function is required for Shh-  
348 mediated induction of *Hhip* expression, and thus, repulsion of post-crossing axons, we carried  
349 out rescue experiments. To this end, we expressed mouse *Hhip* in dl1 neurons lacking *Ift88*.  
350 Consistent with our hypothesis, restoring *Hhip* expression resulted in normal axon guidance. We  
351 found normal axonal navigation at  $63.4 \pm 6.7\%$  of the Dil injection sites (mean  $\pm$  standard  
352 deviation; Fig. 4D). This was not significantly different from control-treated embryos (see Fig. 3C).  
353 In comparison, after knocking down *Ift88* we found normal axon guidance at only  $38.0 \pm 6.9\%$  of  
354 the injection sites (mean  $\pm$  standard deviation,  $p < 0.05$ ).  
355 Taken together, the reduction of *Hhip* expression in dl1 neurons after *Ift88* knockdown and the  
356 rescue of the *Ift88*-dependent axon guidance errors by rescuing *Hhip* expression support the idea  
357 that *Ift88* is part of the Shh-Glypican1-*Hhip* signaling cascade by acting upstream of *Hhip*. Our  
358 results also suggest that a functional primary cilium is required for proper induction of *Hhip*  
359 transcription in these neurons.

360

361 **Live imaging of dl1 commissural axons *ex vivo* suggests a link between Smo localization in**  
362 **primary cilia and rostral turning of dl1 commissural axons**

363 To further support the implication of primary cilia in this pathway, we used our previously  
364 described *ex vivo* culture system to visualize dl1 axon behavior during navigation in real time (Fig.  
365 5A) (Dumoulin et al., 2021). We first confirmed that dl1 neurons still carried a primary cilium after  
366 1 day *ex vivo* in this culture system. Indeed, we could reveal the presence of primary cilia on dl1  
367 neurons (expressing tdTomato-F) by staining for the ciliary marker *Arl13b* (white arrows, Fig. 5B).

368

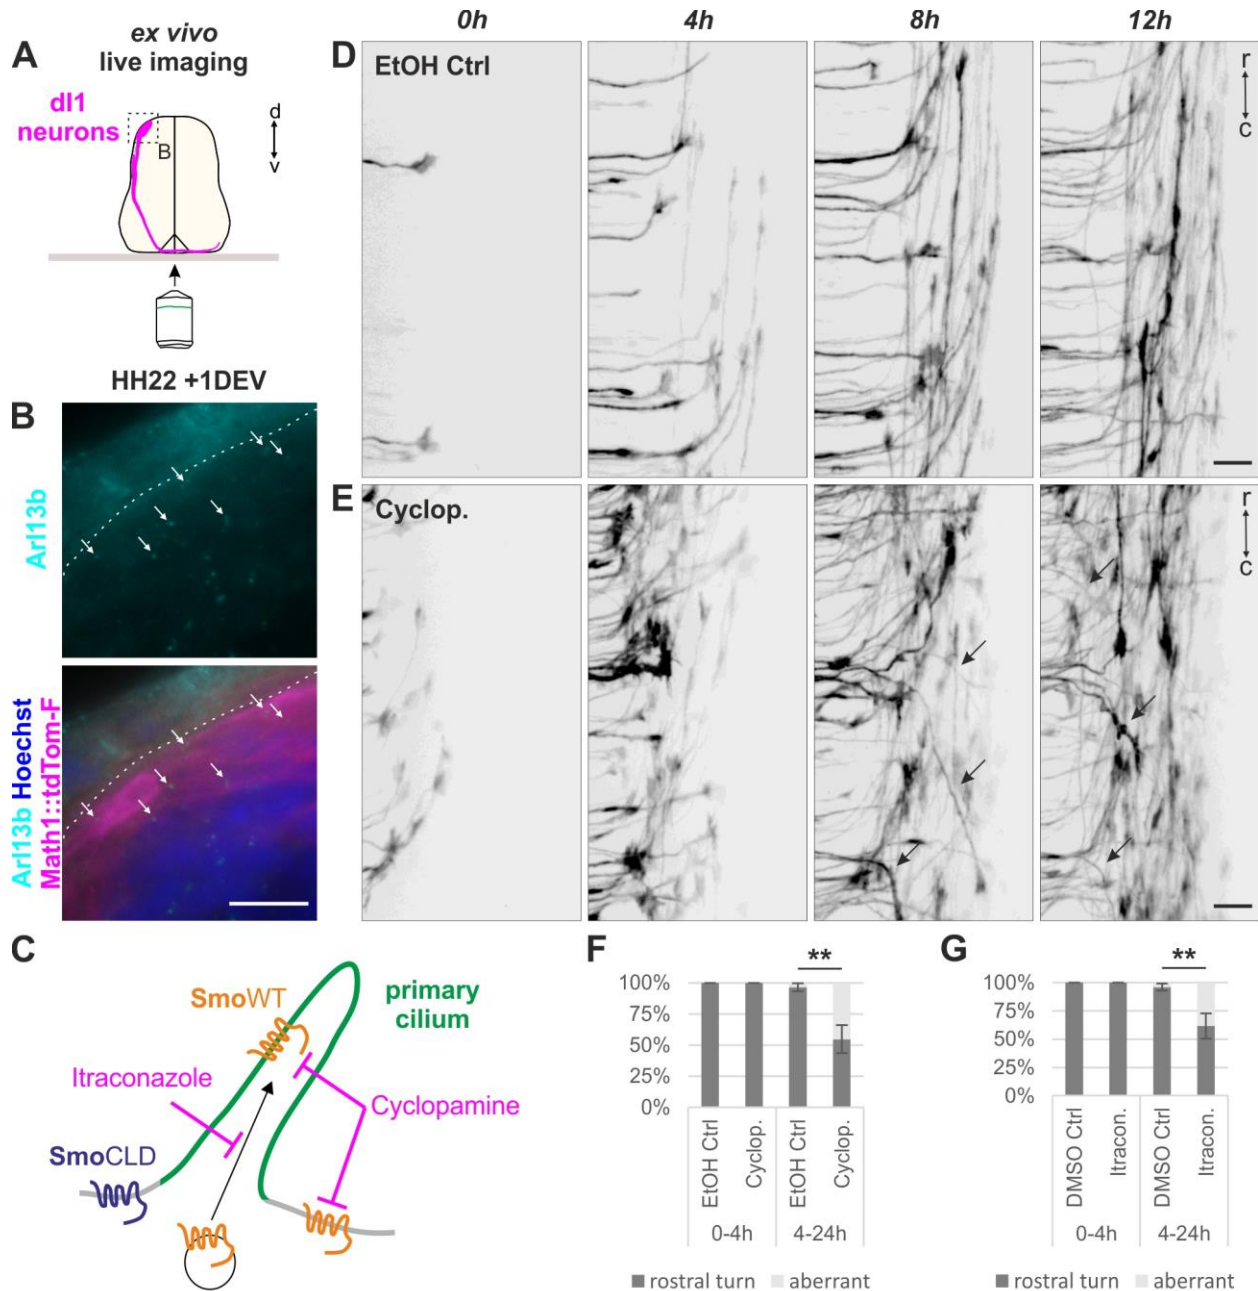

369

370 **Figure 5. Ex vivo live imaging of dl1 commissural axons after Smo inhibition suggests a link**  
 371 **between Smo localization in primary cilia and rostral turning of dl1 commissural axons.**

372 (A) Schematic depicting the ex vivo experimental set up for culture and visualization of dl1 axons  
 373 guidance in the intact spinal cord. (B) After 24h of ex vivo culture, primary cilia were revealed by  
 374 immunohistochemistry on transverse sections with the marker Arl13b (white arrows, cyan) on  
 375 Math1-positive dl1 neuron cell bodies (magenta). Nuclei were counterstained with Hoechst (blue).  
 376 (C) Schematic of ex vivo Smoothened (Smo) inhibition with the pharmacological blockers

377 *Cyclopamine (general inhibition of Smo) and Itraconazole (inhibition of Smo entry into the primary*  
378 *cilium). SmoCLD, a mutant Smo, cannot enter the primary cilium. (D-E) Snapshots of the live*  
379 *monitoring of dl1 commissural axons guidance at the contralateral floorplate border revealed*  
380 *aberrant guidance phenotypes in the presence of 15  $\mu$ M Cyclopamine. Axons were turning*  
381 *caudally instead of rostrally (black arrows, E) compared to ethanol-treated vehicle control (D). (F-*  
382 *G) Quantification of the axon guidance phenotype at the single axon level at the contralateral*  
383 *floorplate border in the presence or absence of Cyclopamine or Itraconazole. No (0%) aberrant*  
384 *phenotype at the contra-lateral floorplate border was seen the first 4h of imaging in both*  
385 *Cyclopamine and Itraconazole-treated samples as well as in control conditions. However, a*  
386 *significant and similar increase of aberrant phenotypes for both inhibitors was found compared*  
387 *to controls between 4 and 24h of imaging (unpaired T-test). N(embryos)= 3 for each condition;*  
388 *n(axons)= 19 (EtOH Ctrl<sup>0-4h</sup>), 36 (Cyclopamine<sup>0-4h</sup>), 198 (EtOH Ctrl<sup>4-24h</sup>), 184 (Cyclopamine<sup>4-24h</sup>), 39*  
389 *(DSMO Ctrl<sup>0-4h</sup>), 40 (Itraconazole<sup>0-4h</sup>), 142 (DSMO Ctrl<sup>4-24h</sup>) and 234 (Itraconazole<sup>4-24h</sup>).  $p < 0.01$  (\*\*).*  
390 *DEV, day ex vivo; r, rostral; c, caudal; Cyclop., Cyclopamine; Itracon., Itraconazole. Scale bars: 10*  
391  *$\mu$ m (B) and 20  $\mu$ m (D,E). Source data and statistics are available in Source Data spreadsheet.*

392

393

394 Transcriptional output in primary cilia-dependent Shh signaling involves Smo translocation into  
395 the cilium (Briscoe and Thérond, 2013). Moreover, Smo was shown to be required for  
396 commissural axon guidance along the longitudinal axis (Parra and Zou, 2010; Yam et al., 2012).  
397 Thus, we took advantage of the *ex vivo* culture system and applied pharmacological blockers to  
398 inhibit Smo function during midline crossing (Fig. 5C). The presence of Cyclopamine in the culture  
399 medium blocked Smo function inside and outside the primary cilium (Fig. 5C). We could observe  
400 that dl1 commissural axons exiting the floorplate randomly turned into the longitudinal axis with  
401 a considerable number of axons turning caudally instead of rostrally (black arrows, Fig. 5E). These  
402 axons formed a disorganized post-crossing segment in comparison to the ethanol (EtOH)-treated



403 control samples in which the large majority of axons turned rostrally (Fig. 5D, Movie S1).  
404 Remarkably, the Cyclopamine-mediated inhibition of Smo did not induce instantaneous aberrant  
405 guidance of commissural axons. There was no obvious effect on commissural axons exiting the  
406 floorplate during the first 4h of inhibition (Movie S1, Fig. 5E). In fact, dl1 growth cones that were  
407 traversing the floorplate, or were about to exit it, when the inhibitor was added all turned  
408 normally in rostral direction at the contralateral border (arrowheads, Movie S2). Mostly the ones  
409 that were not in the floorplate at the beginning of live imaging showed aberrant phenotypes  
410 (open arrowheads, Movie S2). Quantifications revealed that during the first 4 hours of time-lapse  
411 recording, there was no aberrant phenotype in both Cyclopamine- and control-treated samples  
412 (Fig. 5F,  $p > 0.05$ ). In contrast, between 4 and 24h of recording, the number of axons that turned  
413 caudally or stalled at the floorplate exit site was significantly higher ( $45 \pm 11\%$ ) than in control ( $3$   
414  $\pm 3\%$ , mean  $\pm$  standard deviation, Fig. 5F,  $p < 0.01$ ). The fact that the Cyclopamine-mediated  
415 inhibition of Smo did not have an immediate effect on axon guidance was in agreement with our  
416 model that the aberrant phenotypes seen after at least 4 hours of culture (4.5 hours of inhibition)  
417 were caused by a transcriptional function of Smo. This also raised the possibility that these  
418 phenotypes were not caused by a growth cone-localized function of Smo as described for pre-  
419 crossing commissural axons (Yam et al., 2009). In line with our hypothesis, inhibition of Smo entry  
420 into the cilium with Itraconazole (Fig. 5C) (Kim et al., 2010) resulted in a very similar outcome.  
421 Axons behaved normally for at least the first 4h of culture with 100% of axons turning rostrally  
422 (Fig. 5G). After this time point, a significant number of axons ( $38 \pm 8\%$ ) turned caudally or stalled  
423 at the contralateral floorplate border compared to the vehicle-treated control ( $4 \pm 2\%$ , mean  $\pm$   
424 standard deviation, DMSO, Movie S3, Fig. 5G,  $p < 0.01$ ).



425 Taken together, the real-time monitoring of axon guidance combined with pharmacological  
426 blockers of Smo suggest a function of Smo outside the growth cone but inside the primary cilium  
427 of dl1 neurons to allow correct commissural axon guidance at the post-crossing level.

428

429 **Smo localization in the primary cilium is required for the induction of Hhip transcription in dl1**  
430 **neurons and proper axon guidance *in vivo***

431 We previously showed that the expression of a constitutively active Smo in the spinal cord up-  
432 regulated *Hhip* mRNA expression in dl1 neurons, suggesting a role for Smo in the Shh-Glypican-  
433 1-Hhip signaling pathway upstream of Hhip (Wilson and Stoeckli, 2013). To further decipher the  
434 role of Smo in this pathway, we investigated *Hhip* expression in embryos in which Smo  
435 localization to the cilium was perturbed. To achieve this, we knocked down endogenous chicken  
436 Smo, using artificial microRNA/shRNA (miSmo; Fig. S6), and then attempted to rescue *Hhip*  
437 expression by co-electroporating constructs encoding wildtype human Smo (hSmoWT), or a Smo  
438 mutant with two amino acid substitutions which cause defective ciliary localization (hSmoCLD).  
439 In contrast to hSmoWT, hSmoCLD cannot activate the transcription-dependent Shh response  
440 (Bijlsma et al., 2012; Corbit et al., 2005). Supporting the idea that *Hhip* induction in commissural  
441 neurons requires the cilium, we found that hSmoWT, but not hSmoCLD, could rescue *Hhip*  
442 expression in dl1 neurons following the knockdown of endogenous Smo on one side of the spinal  
443 cord (Fig. 6). We found that the average normalized ratio of *Hhip* expression in dl1 neurons after  
444 hSmoWT rescue was significantly higher than the one after either simple knockdown or rescue  
445 with hSmoCLD (Fig. 6D,  $p < 0.05$ ). Furthermore, expression of hSmoWT, but not hSmoCLD, rescued  
446 the axon guidance phenotypes induced by silencing endogenous *Smo* (Fig. 6E). After silencing

447 *Smo* or expression of hSmoCLD after *Smo* knockdown, we found normal axon behavior at only 31  
448  $\pm 20\%$  and  $25 \pm 8\%$  of the Dil injection sites (mean  $\pm$  standard deviation). Only the rescue with  
449 hSmoWT brought the percentage of normal phenotype to a level similar to controls (see Fig. 3C)  
450 with  $64 \pm 17\%$  of the Dil sites with normal axonal behavior at the ventral midline (mean  $\pm$  standard  
451 deviation, Fig. 6E,  $p < 0.01$  versus miSmo and  $p < 0.05$  versus miSmo+hSmoCLD). Together, these  
452 results demonstrate that *Hhip* induction in the dorsal spinal cord relies on the ability of *Smo* to  
453 localize to the cilium. As *Hhip* mediates post-crossing commissural axon guidance (Bourikas et al.,  
454 2005; Wilson and Stoeckli, 2013), these results reveal a critical requirement for primary cilium-  
455 mediated Shh signaling in axonal navigation.  
456

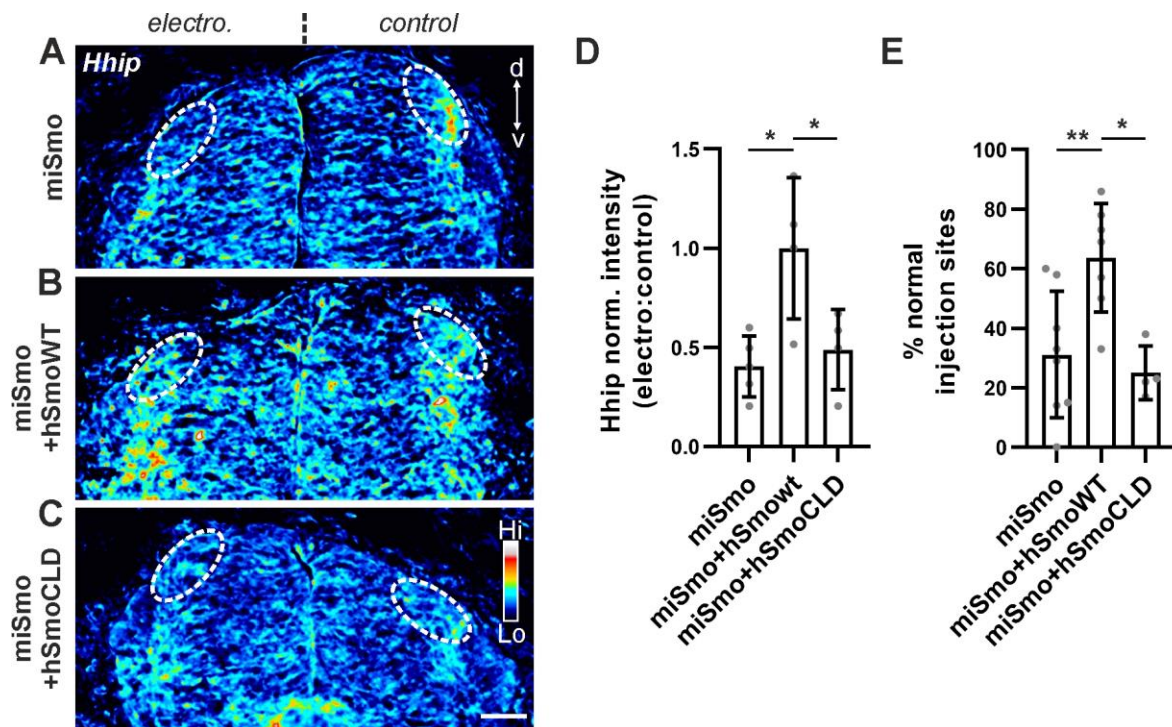

457  
458 **Figure 6. *Smo* localization in the primary cilium is required for transcription of *Hhip* in *dl1***  
459 ***neurons and proper axon guidance in vivo.***

460 (A-C) Heat-map *in situ* hybridization pictures of HH25 dorsal spinal cords showing *Hhip* mRNA. Co-  
461 electroporation of wild-type human *Smo* (*hSmo*WT) rescued *Hhip* expression that was lost after  
462 *Smo* knockdown (A) in *dl1* neurons (dashed ovals) compared to control side (B) whereas a *Smo*CLD  
463 mutant could not (C). (D) Quantification of *Hhip* *in situ* hybridization in *dl1* neurons represented  
464 as a ratio between electroporated versus control side of the spinal cord and normalized to the  
465 average ratio of *miSmo*+*hSmo*WT condition. One-way ANOVA with Tukey's multiple comparisons  
466 test.  $N(\text{embryos}) = 5$  (*miSmo*), 4 (*miSmo*+*hSmo*WT) and 4 (*miSmo*+*hSmo*CLD). Note that each dot  
467 represents the average normalized ratio per embryo. (E) Rescue of *Hhip* expression after  
468 downregulation of *Smo* by co-electroporation of *hSmo*WT also rescued *miSmo*-induced axon  
469 guidance errors. Co-electroporation of cilia-localization-defective *hSmo*CLD was not able to  
470 rescue axon guidance. One-way ANOVA with Tukey's multiple comparisons test.  $N(\text{embryos}) = 8$   
471 (*miSmo*), 7 (*miSmo*+*hSmo*WT) and 4 (*miSmo*+*hSmo*CLD).  $p < 0.01$  (\*\*),  $p < 0.05$  (\*) and  $p > 0.05$  (ns).  
472 *d*, dorsal; *v*, ventral; *Hi*, high; *Lo*, low; *electro*, electroporated. Scale bar: 50  $\mu\text{m}$ . Source data and  
473 statistics are available in Source Data spreadsheet.

474

475

#### 476 **Shh is transported from the axonal compartment to the soma of commissural neurons *in vitro***

477 During the time window of midline crossing by commissural axons, Shh is exclusively expressed  
478 in the floorplate (Bourikas et al., 2005). The requirement for the ciliary genes *lft88* and *lft52*, as  
479 well as *Smo* localization to the primary cilium to trigger the Shh-Glypican-1-Hhip signaling  
480 cascade in *dl1* neurons imply that a retrograde signal might come from the growth cones and  
481 travel to the soma, where the primary cilium is localized, when commissural axons are reaching  
482 the ventral midline of the CNS. This means that in order to trigger *Smo* translocation to the  
483 primary cilium, Shh needs to be transported from the growth cone to the soma, where it can bind  
484 to its receptor Patched, and thus, induce its ciliary exit.

485

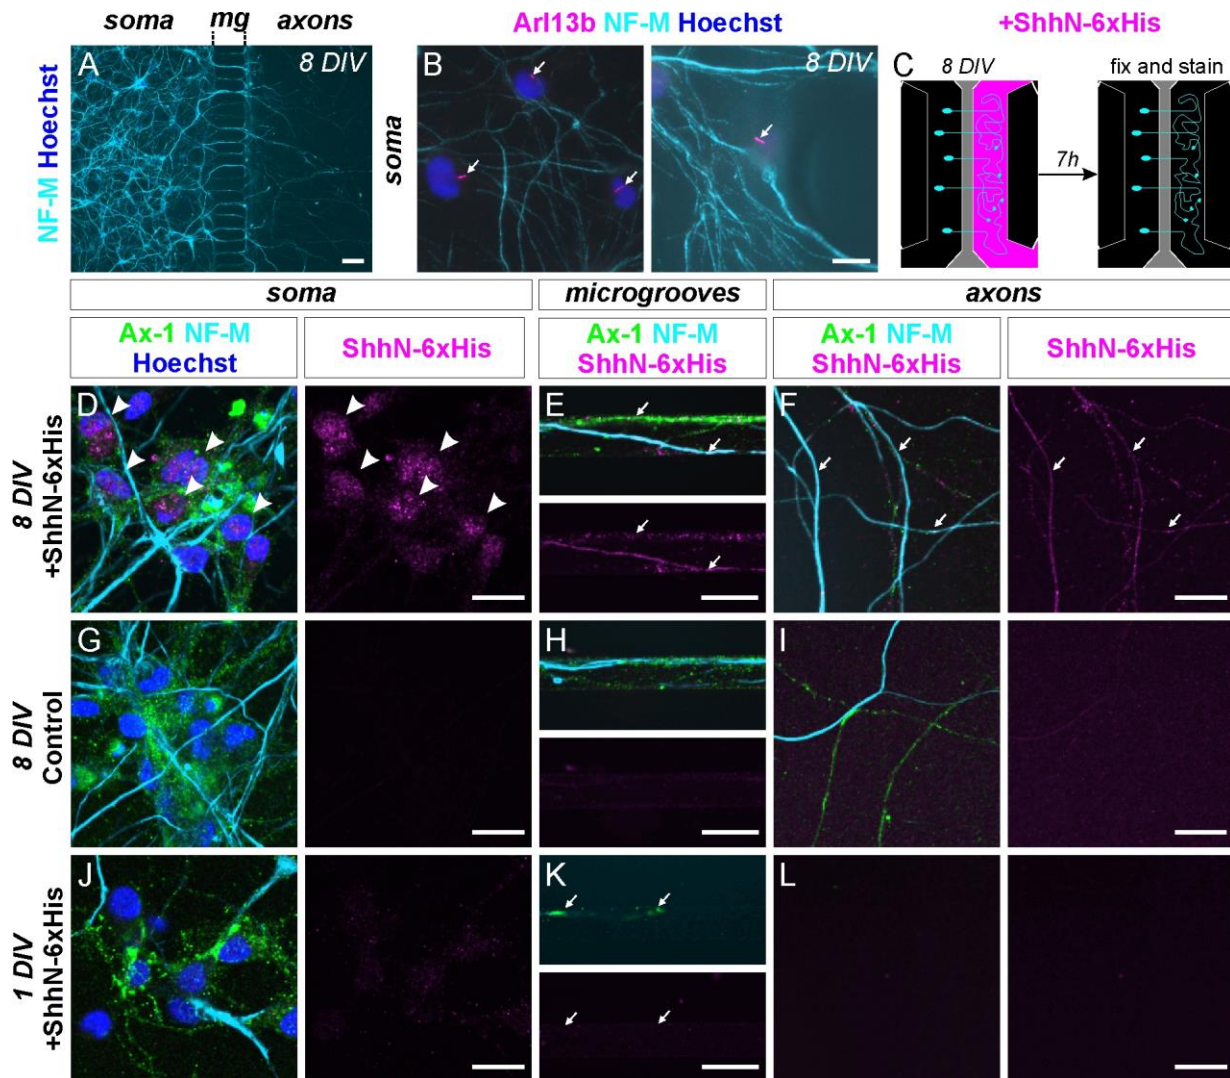

486

487 **Figure 7. Shh is transported from the axonal compartment to the soma of commissural neurons**  
 488 **cultured in microfluidic chambers.**

489 (A) Immunostaining of commissural neurons with neurofilament-M (cyan) cultured for 8 days in  
 490 vitro in compartmentalized microfluidic chambers showing that axons could populate the axonal  
 491 compartment. (B) Commissural neurons stained with neurofilament-M (cyan) still carried a  
 492 primary cilium (white arrows), as shown by Arl13b staining (magenta). (C) Schematic of the  
 493 experimental setup used to assess the localization of recombinant ShhN tagged with 6xHis (ShhN-  
 494 6xHis, magenta). Commissural neurons (cyan) were cultured for 8 days in vitro before ShhN-6xHis  
 495 was added for 7h in the axonal compartment. After that, neurons were washed, fixed and stained  
 496 for neuronal markers neurofilament-M (cyan), commissural neuron marker Axonin-1 (green), and

497 *His tag (magenta), as shown in (D-J). (D) After 7h of incubation recombinant Shh (magenta) could*  
498 *be seen at the axonal level in the axonal compartment and microgrooves (white arrows) as well*  
499 *as at the soma level of commissural neurons (white arrowheads). (G) A first control was*  
500 *performed without application of the recombinant Shh in the axonal compartment leading to no*  
501 *His staining in all compartments, showing the specificity of the His antibody. (H) Most*  
502 *importantly, commissural neurons cultured for only one day in vitro that did not yet have the time*  
503 *to project their axons to the axonal compartment (white arrows point to growth cones traversing*  
504 *the microgrooves at the time of fixation) did not show any accumulation of recombinant Shh*  
505 *(magenta) at their somas (white arrowheads). This confirmed the proper fluidic*  
506 *compartmentalization between chambers. Nuclei were counterstained with Hoechst (blue). DIV,*  
507 *days in vitro; mg, microgrooves; Ax-1, Axonin-1; NF-M, neurofilament-M. Scale bars: 100  $\mu\text{m}$  (A),*  
508 *10  $\mu\text{m}$  (B) and 20  $\mu\text{m}$  (D-L).*

509

510

511 To investigate this aspect we utilized microfluidic chambers with two chambers separated by  
512 microgrooves to culture dissociated commissural neurons dissected from HH25-26 chicken spinal  
513 cords. Neurons were seeded in the soma chamber and cultured for 8 days *in vitro* to allow their  
514 axons to cross the microgrooves and populate the axonal chamber (Fig. 7A). With this  
515 experimental setup, we could separate commissural axons from their soma. Importantly, after  
516 such a long time in culture, commissural neurons still carried a primary cilium as shown by co-  
517 staining of the primary cilium marker Arl13b and the neuronal marker neurofilament-M (arrows,  
518 Fig. 7B). To assess whether Shh could be transported from the axons to the soma of commissural  
519 neurons, we incubated the axons in the axonal chamber with recombinant ShhN fused to a 6xHis  
520 tag for 7 hours. Cultures were then washed and stained for Shh with an antibody against the His  
521 tag, with antibodies against Axonin-1 to label commissural axons or neurofilament-M (Fig. 7C).



522 We detected ShhN-6xHis at the axonal level in the axonal compartment and in the microgrooves  
523 between chambers (arrows, Fig. 7E,F) and also at the soma level of commissural neurons  
524 (arrowheads, Fig. 7D). We could not see any signal in control samples that were not incubated  
525 with recombinant Shh (Fig. 7G-I). Moreover, in microfluidic chambers containing commissural  
526 neurons that were cultured for only one day *in vitro* (Fig. 7J-L), and therefore did not have axons  
527 reaching the axonal chamber yet (arrows, Fig. 7K), we did not see any recombinant Shh at the  
528 soma level (arrowheads, Fig. 7J). This means that both soma and axonal chambers were fluidically  
529 isolated from each other during the 7-hour incubation time.

530 These results demonstrate that Shh can be retrogradely transported along axons of cultured  
531 commissural neurons, suggesting that Shh could reach the cell soma, when commissural axons  
532 are contacting the Shh-expressing floorplate *in vivo*. Taken together, our experiments  
533 demonstrate a primary cilium-dependent role of Shh in the induction of Hhip, its own receptor  
534 for the post-crossing phase of axon guidance.

535

536

537 **Discussion**

538 Genes related to primary cilia formation, trafficking, and maintenance play crucial roles during  
539 development of the nervous system at many levels (Hasenpusch-Theil and Theil, 2021; Park et  
540 al., 2019; Suciu and Caspary, 2021). The use of animal models, especially the mouse, showed that  
541 mutation of ciliary genes led to aberrant formation of axonal tracts in the brain as well as axonal  
542 targeting in the CNS and PNS (Asadollahi et al., 2018; Green et al., 2018; Guo et al., 2019; Tadenev  
543 et al., 2011). The axonal tract malformations are reminiscent of the ones observed in patients  
544 with ciliopathies, such as Joubert syndrome (Sattar and Gleeson, 2011). Moreover, it was recently  
545 reported that loss of the ciliary genes *Arl13b* or *Inpp5e* had an impact on the development of  
546 callosal axons that cross the cortical midline to from the corpus callosum (Guo et al., 2019). This  
547 raised the possibility that these genes, and therefore a functional cilium, was involved in axonal  
548 navigation of intermediate targets in the CNS.

549 The developing spinal cord of mouse and chicken embryos enabled us to investigate the role  
550 played by the primary cilium in dl1 commissural neurons within the time window when their  
551 axons reached and crossed the intermediate target – the floorplate. We showed that these  
552 neurons carried a primary cilium when their axons were crossing the midline in both chicken and  
553 mouse embryos (Fig. 1). The use of a hypomorphic mouse model of the IFTB gene *Ift88* with  
554 reduced ciliation in dl1 neurons revealed axon guidance defects at the exit of the CNS ventral  
555 midline (Fig. 2). Although these observations were compatible with a role for primary cilia in  
556 regulating the guidance of dl1 neurons at an intermediate target, the ventral patterning defects  
557 of the neural tube and loss of *Shh* in the floorplate in this mutant precluded any clear conclusion.  
558 Thanks to the spatiotemporal precision of *in ovo* RNAi-mediated knockdown of *Ift88* in the dorsal



559 chicken spinal cord, we could demonstrate a cell-autonomous role for *Ift88* in the guidance of  
560 *dl1* axons (Fig. 3). This showed that the loss of *Ift88* had an impact on post-crossing axons which  
561 were mostly unable to turn rostrally (Fig. 3E,F). This phenotype was compatible with a loss of  
562 axonal sensitivity to gradients involved in their rostral turning, such as *Shh* (Bourikas et al., 2005).  
563 *Ift88* reduction in the hypomorphic mouse model, or silencing of *Ift88* at E3 in embryonic chicken  
564 *dl1* neurons, did not have a detectable impact on pre-crossing *dl1* axon guidance or growth rate,  
565 as reported in recent studies after manipulating *Arl13b* in primary cilia of interneurons at early  
566 stages in the chicken neural tube (Fig. 3 and S3), or in axons of deep cerebellar nuclei (Guo et al.,  
567 2019; Toro-Tapia and Das, 2020). Interestingly, *Ift88* has been previously shown to be cell-  
568 autonomously required for the guidance of olfactory sensory axons projecting to dorsal glomeruli  
569 (Green et al., 2018). Note that the mild phenotype obtained after ventral knock-down of *Ift88*  
570 might indicate a contribution of the primary cilium in maintaining the polarization of floorplate  
571 cells, as the apical end feet of these cells bear a primary cilium pointing towards the central canal  
572 (Fig. 3H,I) (Cruz et al., 2010).

573 Importantly, by investigating *Hhip* expression and function in *dl1* neurons we could show that  
574 *Ift88* functions upstream of *Hhip*, allowing its transient expression and engagement in axon  
575 guidance *in vivo* (Fig. 4). This also suggested the involvement of a functional primary cilium in  
576 long-range guidance of *dl1* axons via *Shh* signaling (Wilson and Stoeckli, 2013). However, a cilium-  
577 independent role for *Ift88* in this system cannot be excluded. In fact, the ciliary protein *Arl13b*  
578 has been recently reported to play a role outside the cilium in the guidance of pre-crossing *dl1*  
579 axons in a transcription-independent manner in the mouse (Feret et al., 2019). Both the  
580 transcriptional change in *Hhip* expression after *Ift88* knockdown and *Smo* localization into the

581 cilium, which is required for both *Hhip* mRNA expression in dl1 neurons and correct dl1 axon  
582 guidance *ex vivo* and *in vivo* (Fig. 4, 5, and 6), strongly support a model in which the primary cilium  
583 functions upstream of *Hhip* in dl1 neurons. Thus, our data support a role for the primary cilium  
584 in switching commissural dl1 axons' responsiveness to Shh from attraction to repulsion at the  
585 intermediate target (Fig. 8). This implies a switch of Shh signaling in these neurons from a  
586 transcription-independent to a transcription-dependent manner (Fig. 8) (Yam et al., 2012). The  
587 average time dl1 axons take from their first contact with the floorplate (Shh producing cells) to  
588 initiating the rostral turning at the contralateral border (~7h) is compatible with a transcriptional  
589 switch of Shh receptors (Dumoulin et al., 2021). This also raises the question of which  
590 transcription factor(s) is/are required downstream of the primary cilium to induce *Hhip*  
591 transcription. In line with a transcription-dependent role for the primary cilium in this system,  
592 previous results supported that *Hhip* transcription induction in dl1 neurons might be Gli-  
593 dependent as Gli1 or 2 overexpression induced up-regulation of *Hhip* in the dorsal spinal cord  
594 (Wilson and Stoeckli, 2013). Moreover, a Hedgehog-insensitive dominant repressor of Smo  
595 abolished *Hhip* expression in dl1 neurons, further supporting transcription-dependent Shh  
596 signaling (Wilson and Stoeckli, 2013). Nevertheless, further experiments are required to assess  
597 in more detail whether the Gli-dependent transcriptional pathway is activated, when dl1 axons  
598 are crossing the floorplate, and whether this depends on a functional primary cilium.

599

600

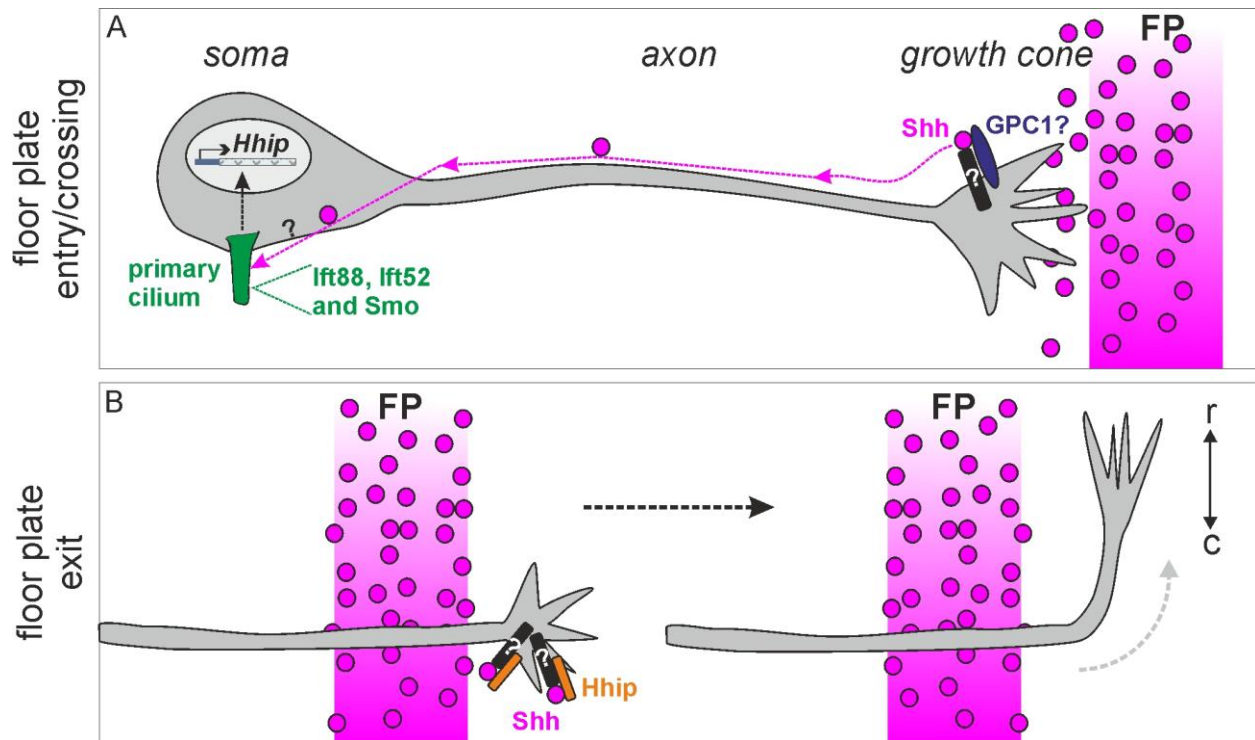

601

602 **Figure 8. Model for the primary cilium's function in Shh-mediated transcriptional regulation of**  
603 **Hhip and thus, the switch in responsiveness during long-range commissural axon guidance.**

604 (A) Our data support a signaling pathway in which Shh produced by the floorplate is retrogradely  
605 transported to the soma of commissural neurons, when their growth cone contacts the  
606 intermediate target. As the Glypican-1--Shh interaction was reported to be required for the  
607 induction of Hhip transcription, it is likely that Glypican-1 interacts with Shh at the growth cone  
608 and that by a yet unknown mechanism Shh is transported retrogradely in- or outside the axons.  
609 Ciliary proteins Ift88 and Ift52, and Smo localization to the cilium are required for correct  
610 commissural axon guidance. Ift88 as well as Smo in the cilium are both required for the induction  
611 of Hhip transcription. Together, this strongly supports a model in which the cilium plays a pivotal  
612 intermediate role in this signaling cascade. When Shh reaches the soma, it would induce Patched  
613 exit of the primary cilium, and in turn, cause Smo entry, leading to a transcriptional output. (B)  
614 Once the commissural axons exit the floorplate at the contralateral side, Hhip protein has to be  
615 expressed and transported to the growth cone surface, causing the repulsive response to the  
616 caudal<sup>high</sup>-rostral<sup>low</sup> Shh gradient and the turn towards the brain. Black rods represent unknown  
617 co-receptors. FP, floorplate; GPC1, Glypican-1; r, rostral; c, caudal.

618

619

620 Our results also bring some new insights in how Shh might signal in a long-range manner in  
621 neurons. When dl1 axons reach the floorplate – the only source of Shh in the spinal cord at that  
622 time – their cilium is located around 400-500  $\mu\text{m}$  away from it. We know that the Glypican1-Shh  
623 interaction is required for *Hhip* induction in dl1 neurons (Wilson and Stoeckli, 2013) and this  
624 study suggests that a functional primary cilium is required for *Hhip* induction. This implies that  
625 the Shh protein has to be transported to the cilium on the neuronal cell body. Indeed our  
626 microfluidic assays supported this hypothesis (Fig. 7).

627 Recently, Shh has been shown to be anterogradely transported by retinal ganglion cells via their  
628 axons and to be secreted in the optic chiasm, where it could act as a repellent for ipsilateral  
629 populations of retinal ganglion cell axons (Peng et al., 2018). Here, our results show that the dl1  
630 population of commissural neurons is able to retrieve and transport Shh for a long distance in a  
631 retrograde manner. Future experiments will be required to assess whether Shh is transported at  
632 the surface of dl1 axons or whether it is internalized. By analogy to other systems, we could  
633 imagine two plausible scenarios: (1) Shh could be internalized at the growth cone, transported  
634 internally, and secreted at the soma, as it is the case in Shh transcytosis in epithelial cells (Ho and  
635 Stearns, 2021). (2) as an interaction between Glypican 1 and Shh is required in our system, we  
636 can imagine that Shh is transported retrogradely at the surface of dl1 axons, as it is the case in  
637 *Drosophila* with the Glypican orthologue Dally-like protein (dlp), which is present in cytonemes  
638 of receiving cells (long signaling filopodia) (González-Méndez et al., 2017). In our case, dl1 axons

639 might play the role of a receiving cytoneme for long-range transport of Shh to the neuronal soma  
640 (Fig. 8A).

641 Taken together, we propose a signaling model in which Shh, secreted by the floorplate, is  
642 retrogradely transported by dl1 axons after contact with the intermediate target. Thus, Shh  
643 reaches their soma and transmits a signal at the primary cilium, which will induce transcriptional  
644 activation of *Hhip* (Fig. 8A). At the time when dl1 axons exit the floorplate, Hhip protein is  
645 expressed and can act as a Shh receptor on the growth cone surface to respond to the repulsive  
646 Shh gradient and make the axon turn rostrally towards the brain (Fig. 8B) (Bourikas et al., 2005).  
647 These results shed light on a molecular mechanism of axon guidance that might contribute to our  
648 understanding of the etiology of human ciliopathies. The results presented here are in agreement  
649 with our recent findings on the role of C5ORF42 (also termed CPLANE1 or JBTS17) in neural circuit  
650 formation (Asadollahi et al., 2018). Patients with mutations in this gene were diagnosed with a  
651 subtype of Joubert syndrome, OFDVI (oro-facial-digital syndrome type VI) (Bayram et al., 2015;  
652 Romani et al., 2015). Fibroblasts derived from patients exhibited a lack of cilia. Furthermore, the  
653 phenotypes of the patients with a mutation in C5ORF42 were very similar to those with a  
654 mutation in *Kif7*, another ciliary gene. Most importantly, the axon guidance phenotypes observed  
655 in chicken embryos after silencing C5ORF42 were very similar to those described here for  
656 embryos lacking functional cilia in the absence of *Ift88* (Asadollahi et al., 2018). Taken together,  
657 these studies suggest that primary cilium-mediated, transcription-dependent Shh signaling is  
658 required for neural circuit formation.

659

660

661 **Materials and Methods**

662

663 ***Animals***

664 All experiments were approved and carried out according to the guidelines of the Cantonal  
665 Veterinary Office Zurich. Cobblestone (*cbs*) mice were generated as described (Willaredt et al.,  
666 2008) and genotyped by PCR, using genomic DNA. The following primer sets were used:  
667 forward1: 5'-TTGACATCTGGATATGACAATGC, reverse1: 5'-TGTGCATGTTTGTGTACATATGTG; and  
668 forward2: 5'-TGGTGTCTCCTTCGGAATTT, reverse2: 5'-TAAATGTAAAAGGTAAAGGCAATGG. Noon  
669 of the day of the vaginal plug was designated embryonic day 0.5 (E0.5). Fertilized chicken eggs  
670 were obtained from a local farm and staged according to Hamburger and Hamilton (Hamburger  
671 and Hamilton, 1951).

672

673 ***Assessment of the longitudinal Shh gradient***

674 Wildtype E12.5 NMRI mice were sacrificed, pinned flat in the supine position, and fixed in 4%  
675 paraformaldehyde (PFA) in PBS for 2 hours at room temperature, before rinsing in phosphate  
676 buffered saline (PBS), and soaking in 25% sucrose in PBS overnight. Embryos were mounted and  
677 frozen in TissueTek O.C.T. compound. Twenty-five  $\mu\text{m}$ -thick transverse sections were collected,  
678 with 10 sections on each slide, at 400  $\mu\text{m}$  intervals. The collected area spanned from the  
679 hindlimbs to the forelimbs. After *in situ* hybridization, *Shh* intensity in the floorplate was  
680 calculated using ImageJ software (NIH, USA). *In situ* images were inverted, the floorplate area  
681 was selected, and the Mean Grey Value in the selected area was measured. The selected border

682 was moved to an area of the section in the dorsal spinal cord (where no *Shh* is present) and the  
683 Mean Gray Value was resampled as a background measurement. This background value was  
684 subtracted from the floorplate measurement to give a final *Shh* intensity measurement in each  
685 section. *Shh* measurements along the longitudinal axis were normalized within each embryo by  
686 dividing the measured intensity at the mid-trunk and forelimb levels by the value obtained in the  
687 hindlimb region. Thus, normalized *Shh* intensity values of <1 in the mid-trunk and forelimb levels  
688 indicated weaker expression than in the hindlimb region of the same embryo. Twelve embryos  
689 were used in the analysis. Data is presented as mean  $\pm$  SEM and was subjected to a single-sample  
690 T-test against an intensity of 1 (arbitrary units).

691

### 692 ***Long double-stranded RNA and siRNA***

693 Chicken ESTs of *Ift88* (ChEST 972d21) and *Ift52* (ChEST 490p6) were obtained from Source  
694 BioScience LifeSciences (Nottingham, UK). The *Ift88* plasmid was linearized with EcoRI or NotI,  
695 while the *Ift52* plasmid was linearized with KpnI or SacI (New England Biolabs), for the synthesis  
696 of sense and antisense single-stranded RNAs (ssRNA) with T7 and T3 RNA polymerase (Promega),  
697 respectively. Equal amounts of purified ssRNAs were annealed by allowing the solution to cool  
698 slowly to room temperature after heating at 95°C for 10 minutes. Successful double-strand  
699 formation was verified by gel electrophoresis. As a control, we used dsRNA synthesized from a  
700 209 bp fragment of red fluorescent protein (mRFP1). Long dsRNAs were electroporated at a  
701 concentration of 400 ng/ $\mu$ l in PBS, together with 40 ng/ $\mu$ l of a transfection reporter plasmid  
702 encoding humanized *Renilla* GFP (hrGFPII; Stratagene) and 0.01% Fast Green (AppliChem).



703 We used an *in vitro* reporter approach to test the effectiveness of target gene knockdown of the  
704 different dsRNA sequences (Fig. S5 and S6). The *Ift88* or *Ift52* EST sequences were cloned into a  
705 CMV-driven vector, between the stop codon of *EGFP* and a poly-A tail. Long dsRNAs were  
706 digested to siRNAs and purified according to the instructions of ShortCut® RNase III (NEB). We  
707 then co-transfected COS7 cells with the *Ift* reporter constructs, together with EBFP2 (as a  
708 transfection control) and siRNA against *RFP*, *Ift52* or *Ift88*, using Lipofectamine 2000 (Invitrogen)  
709 in LabTekII chamber slides (Nunc). Expression levels of EBFP2 and EGFP were assessed 24 hours  
710 later. Ten images in each condition were quantified in ImageJ (Mean Gray Values), then  
711 normalized to transfection levels (EGFP:EBFP2) and subjected to statistical analyses (One-way  
712 ANOVA with Tukey's multiple comparisons test).

713

#### 714 **Artificial miRNAs**

715 Plasmids encoding artificial miRNAs against chicken *Smoothened* (*Smo*) and Luciferase were  
716 synthesized as described (Wilson and Stoeckli, 2011). The target sequences were: (miSmo) 5'-  
717 AAGTGCAGAACATCAAGTTCA; (miLuc, against firefly Luciferase; (Wilson and Stoeckli, 2011)) 5'-  
718 CGTGGATTACGTCGCCAGTCAA. For *in ovo* electroporations, we used plasmids (250 ng/μl)  
719 containing a β-actin promoter driving the expression of hrGFPII and an artificial miRNA, followed  
720 by a poly-A tail mix in PBS and Fast Green as described above.

721 The effectiveness of the artificial miRNAs was tested indirectly using a similar method to that  
722 described above for the dsRNAs (Fig. S6; (Wilson and Stoeckli, 2011)). miRNAs were cloned into  
723 pRFPRNAiC vectors and co-transfected into COS7 cells along with *Smo* reporter constructs, in

724 which a 2.2 kb fragment of chick *Smo* was cloned downstream of EGFP in either the 5'-3' direction  
725 or, as a negative control, in the opposite orientation. Expression levels of RFP and EGFP were  
726 assessed 24 hours later. Fifteen images in each condition were quantified in ImageJ (Mean Gray  
727 Values), normalized to transfection levels (EGFP:RFP) and subjected to statistical analyses  
728 (unpaired T-test).

729

### 730 ***SmoWT and SmoCLD constructs***

731 A cDNA clone containing human *Smo-M2*, a constitutively active form of human *Smo* with a single  
732 point mutation (W535L) was kindly provided by J. Briscoe. This construct was tagged with the  
733 first 55 amino acids of human herpes virus glycoprotein D (HHV gD1) at the N-terminus, thus all  
734 subsequent hSmo constructs were detectable using an anti-gD1 antibody. *hSmo-M2* was  
735 mutagenized to *hSmoWT* using the primers 5'-CCATGAGCACCTGGGTCTGGACCAAG and 5'-  
736 CTTGGTCCAGACCCAGGTGCTCATGG. To make *hSmoCLD*, we subsequently mutagenized two  
737 sequential amino acids, W545A and R546A, using the primers 5'-  
738 CATCGCGCGCGTACCTGGTGCAG and 5'-GTACGCGCCGCGATGAGCAGCGTG. These amino acids  
739 were equivalent to W549A, R550A mutations in mouse *Smo*, which cause a ciliary localization  
740 defect (Bijlsma et al., 2012; Corbit et al., 2005). We confirmed *in vitro* that the *hSmo* constructs  
741 were not effectively downregulated by miSmo, which was designed against chicken *Smo* (Fig.  
742 S6D). For *in ovo* electroporations (using 50 ng/ $\mu$ l), the *Smo* variants were cloned into pMES, which  
743 is driven by a  $\beta$ -actin promoter and contains an IRES-GFP sequence to identify the transfected  
744 cells. The *Smo* variants were excised from pRK7 using HindIII (blunted) and EcoRI, while pMES

745 was digested with XbaI (blunted) and EcoRI. The fragments were ligated using T4 DNA ligase (all  
746 enzymes from NEB).

747

#### 748 ***Electroporation and assessment of axon guidance phenotypes***

749 A detailed video protocol demonstrating the electroporation, dissection and Dil injection steps  
750 in chicken embryos is available online: <http://www.jove.com/video/4384> (Wilson and Stoeckli,  
751 2012). In brief, embryos were injected and electroporated at HH17-18, using a BTX ECM830  
752 square-wave electroporator (5 pulses of 25 V, 50 msec duration, 1 sec interpulse interval).  
753 Targeted dorsal and ventral electroporations were achieved by careful positioning of the  
754 electrodes relative to the neural tube, and successful targeting was verified by hrGFPII  
755 expression. The resulting axon guidance phenotypes were assessed by axonal tracing with Dil in  
756 open-book preparations of spinal cords. Note that the downregulation and rescues experiments  
757 of Smo were performed around HH15-16 to efficiently downregulate Smo. The spinal cords of  
758 E12.5 mice or HH25-26 chicken embryos were dissected, and 'open-book' preparations were  
759 made by cutting along the roof plate and pinning the spinal cord open with the basal sides down,  
760 as depicted in Fig. 2F. At least 7 embryos were examined in each condition by a person blind to  
761 the experimental condition. Fast-Dil (5 mg/ml in ethanol; Molecular Probes) was applied by focal  
762 injection into dorsal commissural neurons. Labeled axons at the midline were documented by  
763 confocal microscopy (Olympus DSU coupled to BX61 microscope). Only Dil injections sites that  
764 were in the appropriate location in the dorsal-most part of the spinal cord, and (for the chicken  
765 embryos) within the region expressing fluorescent protein, were included in the analysis. As it

766 was impossible to count axons at individual injection sites, the percentage of axons displaying  
767 abnormalities was estimated, and the injection site was classified as showing a ‘FP stalling’  
768 phenotype, if >50% of axons stalled within the floorplate, or a ‘post-crossing’ phenotype, if >50%  
769 of axons that reached the contralateral floorplate border failed to make a correct turning decision  
770 into the longitudinal axis. At a single abnormal Dil injection site, it was possible that more than  
771 one class of phenotypic error was observed. The total number of Dil sites in each condition was  
772 pooled and the percentage of normal injections sites were statistically compared across  
773 conditions.

774

#### 775 ***In situ hybridization***

776 *In situ* hybridization and immunolabeling were performed as described (Mauti et al., 2006;  
777 Wilson and Stoeckli, 2011). All sense and antisense ISH probes were generated using SP6, T7 or  
778 T3 RNA polymerase, and DIG RNA Labeling mix (Roche). A plasmid containing a fragment of  
779 mouse cDNA for Shh was a gift from T. Thier. The chick *Hhip* probe was previously described  
780 (Bourikas et al., 2005). Images were acquired with a BX63 upright microscope (Olympus) and a  
781 20x air objective (ACHN P 20x / 0.4, Olympus) and an Orca-R<sup>2</sup> camera (Hamamatsu) with the  
782 Olympus CellSens Dimension 2.2 software.

783 For comparison of the expression patterns of *Shh* along the longitudinal axis of the spinal cords  
784 of WT mice, we embedded several fixed embryos in the same block, to enable a comparison of  
785 different embryos at the same axial level whilst minimizing slide-to-slide variability. The embryos  
786 were laid side-by-side in the supine position in O.C.T. compound (Tissue-Tek), and we aligned

787 their hindlimbs and forelimbs perpendicular to the cutting surface before freezing. Twenty-five  
788  $\mu\text{m}$ -thick cryostat sections at 400  $\mu\text{m}$  intervals were collected on slides, such that each slide  
789 contained 10 sections that spanned from the hindlimb to the forelimb level. Analysis of relative  
790 *Shh* mRNA levels on the control and electroporated sides of the spinal cords was performed as  
791 described (Wilson and Stoeckli, 2013).

792 For *Hhip* *in situ* quantification in dl1 neurons of the electroporated versus the non-electroporated  
793 side on cryosections (Fig. 4 and 6), images were inverted and the mean value within a circle of  
794 50- $\mu\text{m}$  diameter positioned dorsally to the dorsal funiculus was measured on both control and  
795 electroporated side. Another value with the same circle was taken in the motor column of the  
796 un-electroporated (control) side. As *Hhip* is not expressed in the motor column (Wilson and  
797 Stoeckli, 2013) and as the density of cells in this area is quite similar to the area with the dl1  
798 neurons, we used it as a measure of background. This background value was subtracted from  
799 each *Hhip* mean value in dl1 neurons and the ratio electroporated:control side was then  
800 calculated for each section. Note that sections with a mean value of *Hhip* in dl1 neurons inferior  
801 to the background value in the motor column were not taken into account. A minimum of 10  
802 sections were quantified per embryo and the average ratio for each condition was normalized to  
803 the average ratio of GFP controls (Fig. 4C) or hSm $\alpha$ WT rescue (Fig. 6D). For comprehensive  
804 representation *in situ* images were inverted and Royal LUT implemented in ImageJ to highlight  
805 accumulation or reduction of mRNA in dl1 neurons (Fig. 4A,B and 6A-C).

806

807 ***Immunohistochemistry for neuronal patterning***

808 Mouse or chicken embryos were sacrificed, dissected and fixed in 4% PFA in PBS for 1h at room  
809 temperature, as described. After being washed 3 times 5 min in PBS, they were cryopreserved  
810 for 24h in 25% sucrose in PBS at 4°C and then embedded in O.C.T. compound (Tissue-Tek). From  
811 the trunk, 25- $\mu$ m thick transverse sections were cut using a Cryostat (Leica). Sections were  
812 permeabilized for 10 min at room temperature with 0.1% Triton X-100 in PBS, blocked for 1h in  
813 0.1% Triton X100, 5% FCS in PBS (blocking buffer). Cryosections were incubated overnight in the  
814 following primary antibodies diluted in blocking buffer: mouse anti-Pax3 (RRID: AB\_528426),  
815 mouse anti-Islet1 (40.2D6, RRID: AB\_528315), mouse anti-Shh (5E1, RRID: AB\_2188307), mouse  
816 anti-HNF3 $\beta$  (4C7, RRID: AB\_2278498), mouse anti-Lhx2 (PCRP-LHX2-1C11, RRID: AB\_2618817),  
817 mouse anti-Nkx2.2 (74.5A5, RRID: AB\_531794; all from Developmental Studies Hybridoma Bank),  
818 goat anti-GFP-FITC (1:400, Rockland, RRID: AB\_218187) or rabbit anti-Axonin1 (1:1000, (Stoeckli  
819 and Landmesser, 1995)). The next day, sections were washed 3 times 10 min in 0.1% Triton X-  
820 100 in PBS at room temperature and then incubated for 2h with secondary antibodies diluted in  
821 blocking buffer: donkey anti-rabbit-IgG-Cy3 antibody (1:1000, Jackson ImmunoResearch, RRID:  
822 AB\_2307443), donkey anti-mouse-IgG-Cy5 antibody (1:1000, Jackson ImmunoResearch,  
823 RRID:AB\_2338713) or donkey anti-mouse-IgG-Cy3 (1:1000, Jackson ImmunoResearch, RRID:  
824 AB\_2340813). Finally, sections were washed 3 times 10 min in 0.1% Triton X-100 in PBS and 2  
825 times 5 min in PBS before being mounted under a coverslip in Mowiol/DABCO. Images were  
826 acquired with a BX63 upright microscope (Olympus) and a 20x air objective (ACHN P 20x / 0.4,  
827 Olympus) and an Orca-R<sup>2</sup> camera (Hamamatsu) with the Olympus CellSens Dimension 2.2  
828 software.

829

830 ***Immunohistochemistry of primary cilia***

831 For staining of neuronal cilia in the neural tube, we had to modify certain steps of the protocol  
832 to increase signal to background of ciliary staining. Chicken embryos were sacrificed and  
833 dissected as described above in warm (37°C) PBS and then fixed at room temperature in pre-  
834 warmed 4% PFA in PBS for different times according to the stage (HH20, 35 min; HH22, 40 min;  
835 HH24, 40 min; HH26, 45 min). Note that this initial change in the protocol was not required for  
836 mouse embryos. The embedding and cryosections were performed as above as well as the  
837 immunostaining of dl1 neurons with Lhx2 or GFP. Once this staining was finished and sections  
838 washed with PBS, they were incubated for 2h in primary antibodies diluted in 5% FCS in PBS at  
839 room temperature to stain primary cilia with either rabbit anti-Arl13b (1:500, Proteintech,  
840 RRID:AB\_2060867) or rabbit anti-Adenylyl cyclase III (ACIII, 1:500, Santa Cruz, RRID:AB\_630839).  
841 Sections were then washed 3 times for 10 min in PBS and stained for 2h with donkey anti-rabbit-  
842 IgG-Cy3 antibody (1:1000, Jackson ImmunoResearch, RRID:, AB\_2307443) and 2.5 µg/ml of  
843 Hoechst (Cat# H3570, Invitrogen) diluted in PBS. Finally, they were washed 3 times for 10 min in  
844 PBS and mounted as above. Images of cilia stainings were acquired with a BX61 upright  
845 microscope (Olympus) equipped with a spinning disk unit either with a 10x air objective  
846 (overviews; UPLFL PH 10x / 0.30, Olympus) or a 60x oil objective (PLAPON O 60x / 1.42, Olympus)  
847 and an Orca-R<sup>2</sup> camera (Hamamatsu) with the Olympus CellSens Dimension 2.2 software.

848

849 ***Live imaging of intact spinal cords***



850 Live imaging of intact chicken spinal cords was performed as previously described (Dumoulin et  
851 al., 2021). In brief, the neural tube of HH17-18 embryos was injected and unilaterally  
852 electroporated *in ovo* as described above (25 volts, 5 x 50 ms pulses with 1-s interval between  
853 pulses) with 700 ng/ $\mu$ l Math1::tdTomato-F plasmid to label dl1 neurons and 30 ng/ $\mu$ l of  $\beta$ -  
854 actin::EGFP-F plasmid as control in all transfected cells (Dumoulin et al., 2021). Intact spinal cords  
855 were dissected at HH22 and cultured in a 100- $\mu$ l drop of low-melting agarose with the ventral  
856 midline facing down on a 35-mm Ibidi  $\mu$ -dish with glass bottom (Ibidi, Cat#81158) and spinal cord  
857 medium (MEM with Glutamax [Gibco] supplemented with 4 mg/ml Albumax [Gibco], 1 mM  
858 pyruvate [Sigma], 100 units/ml Penicillin and 100  $\mu$ g/ml Streptomycin [Gibco]), as previously  
859 described (Dumoulin et al., 2021).

860 Intact spinal cords were cultured at 37°C, with 5% CO<sub>2</sub> and 95% air in a PeCon cell vivo chamber  
861 (PeCon). CO<sub>2</sub> percentage and temperature were controlled by the cell vivo CO<sub>2</sub> controller and the  
862 temperature controller units, respectively (PeCon). Spinal cords were incubated for 30 minutes  
863 in the chamber before the live imaging acquisition was initiated with an IX83 inverted microscope  
864 equipped with a spinning disk unit (CSU-X1 10,000 rpm, Yokogawa) and a 20x air objective  
865 (UPLSAPO  $\times$ 20/0.75, Olympus) and an Orca-Flash 4.0 camera (Hamamatsu) with the Olympus  
866 CellSens Dimension 2.2 software. We acquired one stack of 30-45 slices with 1.5- $\mu$ m spacing  
867 every 15 min for 24 h with 488 nm and 561 nm emission channels, as well as the bright field  
868 channel to visualize the structure of the midline area. For the Smo inhibition experiments, either  
869 15  $\mu$ M of Cyclopamine diluted in ethanol (MedChemExpress, Cat# HY-17024) or 20  $\mu$ M of  
870 Itraconazole diluted in DMSO (Sigma, Cat# I6657) as a final concentration was added to the spinal  
871 cord medium (1:000 dilution). Control conditions consisted of spinal cords cultured in 1:000

872 dilution of either ethanol (Cyclopamine control) or DMSO (Itraconazole control). As no obvious  
873 defects in midline crossing were detected upon Smo inhibition, we focused our quantification of  
874 aberrant phenotypes on the post-crossing segment of Math1-positive dl1 axons. An axon was  
875 considered to have an aberrant phenotype, if it stalled or turned caudally instead of rostrally, at  
876 the contra-lateral border of the floorplate. Tracing/counting of dl1 axons, processing of time-  
877 lapse video and video montages were performed with Fiji/ImageJ (Schindelin et al., 2012).

878

### 879 ***Commissural neuron cultures in microfluidic chambers***

880 The most dorsal part of the spinal cord, containing mostly dl1 commissural neurons, was cut from  
881 6-7 open-book preparations of wild-type HH25-26 embryos in cold sterile PBS as previously  
882 described (Yusifov et al., 2021). Cells were dissociated with 0.25% Trypsin in PBS (Invitrogen, cat#  
883 15090-046), containing 0.2% DNase (Roche, cat# 101 041 590 01), at 37°C for 20 min followed by  
884 a sequence of trituration in different pre-warmed media (37°C; MEM (Gibco) with 5% FCS (Gibco),  
885 MEM only, and finally in commissural neuron medium) with fire-polished Pasteur pipettes and  
886 centrifugation at 1000 rpm for 5 min at room temperature in-between. Commissural neuron  
887 medium contained MEM/Glutamax (Gibco, Cat# 41090-028) supplemented with 4 mg/ml  
888 Albumax (Gibco), N3 (100 µg/ml transferrin, 10 µg/ml insulin, 20 ng/ml triiodothyronine, 40 nM  
889 progesterone, 200 ng/ml corticosterone, 200 µM putrescine, 60 nM sodium selenite; all from  
890 Sigma) and 1 mM pyruvate (Sigma). Dissociated cells (130'000) in 20 µl commissural neuron  
891 medium volume were given in the upper left well of Xona chip 150 µm microfluidic chambers  
892 connected to the soma chamber (Xona, Cat# XC150). After 5 min at room temperature, 100 µl of  
893 medium were given to all wells. Plates were incubated at 37°C with 5% CO<sub>2</sub> for 1 or 8 day. Every

894 two days, 50% of the volume was changed in each well with freshly prepared medium. The  
895 microfluidic chips were coated with 20 µg/ml poly-L-lysine (Sigma, Cat# P-12374) and 20 µg/ml  
896 laminin (Invitrogen, Cat# 23017-015) following the protocol of the manufacturer (XonaChip™  
897 protocol for primary murine neurons). On the day of stimulation (1 or 8 day *in vitro*), culture  
898 medium was discarded from all wells, and 140 µl commissural medium were added to both left  
899 wells (connected to the soma chamber) and 130 µl of the same medium containing 2.5 µg/ml of  
900 recombinant ShhN-6xHis (R&D, Cat# 1845-SH; 1:40 dilution in medium of stock solution  
901 solubilized in 0.1% BSA) were given to both wells connected to the axonal chamber. Note that in  
902 control experiments without recombinant Shh (Fig. 7G-I) the equivalent amount of 0.1% BSA  
903 (1:40 dilution in medium) was given to the well connected to the axonal chamber. Cells were  
904 then incubated at 37°C with 5% CO<sub>2</sub> for 7 h. Afterwards, the medium from the right side (axonal  
905 chamber) was discarded prior to the one in the soma chamber and then cells were washed once  
906 with pre-warmed (37°C) commissural neuron medium with first adding 100 µl in the left wells  
907 and 80 µl in the right wells. Then, cells were fixed with pre-warmed (37°C) 2% PFA in PBS and  
908 incubated at 37°C with 5% CO<sub>2</sub> for 5 min prior to 15 min under same condition in 4% pre-warmed  
909 PFA in PBS. Finally, cells were washed 3 times for 5 min with PBS (150 µl per well) at room  
910 temperature and stored at 4°C until immunocytochemistry was performed.

911

### 912 ***Immunocytochemistry microfluidic chambers***

913 Importantly, for successful staining in microfluidic chamber microgrooves, the addition of any  
914 buffer in the wells was always 40 µl higher on one side of the dish (typically 150 µl in left wells

915 and 130  $\mu$ l in right wells). Neurons were first permeabilized with 0.1% Triton X-100 in PBS for 5  
916 min at room temperature and washed 3 times 5 min with PBS. They were then blocked for 15  
917 min in 5% FCS in PBS (blocking buffer). Samples were stained overnight with the following primary  
918 antibodies diluted in blocking buffer: mouse anti-neurofilament-M (1:1500, RMO270, Invitrogen,  
919 RRID:AB\_2315286); rabbit anti-6xHisTag (1:2000, Rockland, Cat# 600-401-382) and goat anti-  
920 Axonin-1 (1:1000, (Stoeckli and Landmesser, 1995)). For Arl13b staining, samples were incubated  
921 only for 1h at room temperature with the primary antibody (rabbit anti-Arl13b, 1:1000,  
922 ProteinTech, 13967-1-AP, RRID:AB\_2121979). After being washed 3 times 5 min with PBS at room  
923 temperature, neurons were stained 2 h (1h for Arl13b staining) at room temperature with  
924 secondary antibodies (same as used for immunohistochemistry) diluted in blocking buffer. At the  
925 end, they were counterstained for 5 min with Hoechst (2.5  $\mu$ g/mL, Invitrogen, Cat# H3570)  
926 diluted in PBS at room temperature and washed 3 times for 5 min with PBS.

927 Images were acquired with either an IX81 inverted microscope (Olympus) with a 10x air objective  
928 (UPLFL PH 10x / 0.30, Olympus) or a 60x oil objective (PLAPO O 60x / 1.40, Olympus, Fig. 7A,B),  
929 or with an IX83 inverted microscope, equipped with a spinning disk unit (CSU-X1 10,000 rpm,  
930 Yokogawa) and a 40x silicone oil objective (UPLSAPO S 40x / 1.25, Olympus) and an Orca-Flash  
931 4.0 camera (Hamamatsu) with the Olympus CellSens Dimension 2.2 software. Same acquisition  
932 settings were used to take pictures of the 6xHisTag staining (recombinant Shh) in all conditions.  
933 Three independent experiments were performed with similar outcome.

934

935 ***Statistical analyses***

936 Statistical analyses were performed with GraphPad Prism 7.02 software. All data were tested for  
937 normality (normal distribution) using the D'Agostino and Pearson omnibus K2 normality test and  
938 visual assessment of the normal quantile-quantile plot before choosing an appropriate  
939 (parametric or non-parametric) statistical test.

940

#### 941 **Author Contributions**

942 A.D and N.W. performed experiments; A.D., N.W. and E.S. designed research, analyzed data and  
943 wrote the paper; K.L.T. contributed mice, reagents and critical comments on the paper.

944

#### 945 **Acknowledgements**

946 We thank James Briscoe, Raman Das, Michael Lin, Andrew McMahon, Thomas Thier and for  
947 constructs and probes. For mouse maintenance, genotyping and technical assistance, we are  
948 grateful to Beat Kunz, Marc Willaredt and Tiziana Flego. This work was supported by a grant from  
949 the Swiss National Science Foundation to E.S.. K.L.T. was supported by the Deutsche  
950 Forschungsgemeinschaft (DFG, SFB 488, Teilprojekt B9).

951 **References**

- 952
- 953
- 954 **Asadollahi, R., Strauss, J. E., Zenker, M., Beuing, O., Edvardson, S., Elpeleg, O., Strom, T. M., Joset, P.,**  
955 **Niedrist, D., Otte, C., et al.** (2018). Clinical and experimental evidence suggest a link between KIF7  
956 and C5orf42-related ciliopathies through Sonic Hedgehog signaling /631/208/1516 /692/699  
957 article. *Eur. J. Hum. Genet.* **26**, 197–209.
- 958 **Bangs, F. and Anderson, K. V.** (2017). Primary cilia and Mammalian Hedgehog signaling. *Cold Spring*  
959 *Harb. Perspect. Biol.* **9**, a028175.
- 960 **Bayram, Y., Aydin, H., Gambin, T., Akdemir, Z. C., Atik, M. M., Karaca, E., Karaman, A., Pehlivan, D.,**  
961 **Jhangiani, S. N., Gibbs, R. A., et al.** (2015). Exome sequencing identifies a homozygous C5orf42  
962 variant in a Turkish kindred with oral-facial-digital syndrome type VI. *Am. J. Med. Genet. Part A*  
963 **167**, 2132–2137.
- 964 **Bijlsma, M. F., Borensztajn, K. S., Roelink, H., Peppelenbosch, M. P. and Spek, C. A.** (2007). Sonic  
965 hedgehog induces transcription-independent cytoskeletal rearrangement and migration regulated  
966 by arachidonate metabolites. *Cell. Signal.* **19**, 2596–2604.
- 967 **Bijlsma, M. F., Damhofer, H. and Roelink, H.** (2012). Hedgehog-stimulated chemotaxis is mediated by  
968 smoothed located outside the primary cilium. *Sci. Signal.* **5**, ra60.
- 969 **Bourikas, D., Pekarik, V., Baeriswyl, T., Grunditz, Å., Sadhu, R., Nardó, M. and Stoeckli, E. T.** (2005).  
970 Sonic hedgehog guides commissural axons along the longitudinal axis of the spinal cord. *Nat.*  
971 *Neurosci.* **8**, 297–304.
- 972 **Brennan, D., Chen, X., Cheng, L., Mahoney, M. and Riobo, N. A.** (2012). Noncanonical Hedgehog  
973 Signaling. In *Vitamins and Hormones*, pp. 55–72.
- 974 **Briscoe, J. and Théron, P. P.** (2013). The mechanisms of Hedgehog signalling and its roles in  
975 development and disease. *Nat. Rev. Mol. Cell Biol.* **14**, 418–431.
- 976 **Caspary, T., Marazziti, D. and Berbari, N. F.** (2016). Methods for visualization of neuronal cilia. In  
977 *Methods in Molecular Biology*, pp. 203–214.
- 978 **Charron, F., Stein, E., Jeong, J., McMahon, A. P. and Tessier-Lavigne, M.** (2003). The morphogen sonic  
979 hedgehog is an axonal chemoattractant that collaborates with Netrin-1 in midline axon guidance.  
980 *Cell* **113**, 11–23.
- 981 **Chédotal, A.** (2011). Further tales of the midline. *Curr. Opin. Neurobiol.* **21**, 68–75.
- 982 **Corbit, K. C., Aanstad, P., Singla, V., Norman, A. R., Stainier, D. Y. R. and Reiter, J. F.** (2005). Vertebrate  
983 Smoothed functions at the primary cilium. *Nature* **437**, 1018–1021.
- 984 **Cruz, C., Ribes, V., Kutejova, E., Cayuso, J., Lawson, V., Norris, D., Stevens, J., Davey, M., Blight, K.,**  
985 **Bangs, F., et al.** (2010). Foxj1 regulates floor plate cilia architecture and modifies the response of  
986 cells to sonic hedgehog signalling. *Development* **137**, 4271–4282.
- 987 **de Ramon Francàs, G., Zuñiga, N. R. and Stoeckli, E. T.** (2017). The spinal cord shows the way – How  
988 axons navigate intermediate targets. *Dev. Biol.* **432**, 43–52.
- 989 **Dumoulin, A., Zuñiga, N. R. and Stoeckli, E. T.** (2021). Axon guidance at the spinal cord midline—A live  
990 imaging perspective. *J. Comp. Neurol.* **529**, 2517–2538.
- 991 **Ferent, J., Constable, S., Gigante, E. D., Yam, P. T., Mariani, L. E., Legué, E., Liem, K. F., Caspary, T. and**  
992 **Charron, F.** (2019). The Ciliary Protein Arl13b Functions Outside of the Primary Cilium in Shh-  
993 Mediated Axon Guidance. *Cell Rep.* **29**, 3356–3366.e3.
- 994 **Gazea, M., Tasouri, E., Tolve, M., Bosch, V., Kabanova, A., Gojak, C., Kurtulmus, B., Novikov, O., Spatz,**  
995 **J., Pereira, G., et al.** (2016). Primary cilia are critical for Sonic hedgehog-mediated dopaminergic  
996 neurogenesis in the embryonic midbrain. *Dev. Biol.* **409**, 55–71.
- 997 **Goetz, S. C. and Anderson, K. V.** (2010). The primary cilium: A signalling centre during vertebrate  
998 development. *Nat. Rev. Genet.* **11**, 331–344.

- 999 **González-Méndez, L., Seijo-Barandiarán, I. and Guerrero, I.** (2017). Cytoskeleton-mediated cell-cell  
1000 contacts for hedgehog reception. *Elife* **6**, e24045.
- 1001 **Green, W. W., Uytingco, C. R., Ukhanov, K., Kolb, Z., Moretta, J., McIntyre, J. C. and Martens, J. R.**  
1002 (2018). Peripheral gene therapeutic rescue of an olfactory ciliopathy restores sensory input, axonal  
1003 pathfinding, and odor-guided behavior. *J. Neurosci.* **38**, 7462–7475.
- 1004 **Guo, J., Otis, J. M., Suci, S. K., Catalano, C., Xing, L., Constable, S., Wachten, D., Gupton, S., Lee, J.,**  
1005 **Lee, A., et al.** (2019). Primary Cilia Signaling Promotes Axonal Tract Development and Is Disrupted  
1006 in Joubert Syndrome-Related Disorders Models. *Dev. Cell* **51**, 759-774.e5.
- 1007 **Hamburger, V. and Hamilton, H. L.** (1951). A series of normal stages in the development of the chick  
1008 embryo. *J. Morphol.* **88**, 49–92.
- 1009 **Hasenpusch-Theil, K. and Theil, T.** (2021). The Multifaceted Roles of Primary Cilia in the Development of  
1010 the Cerebral Cortex. *Front. Cell Dev. Biol.* **9**, 630161.
- 1011 **Ho, E. K. and Stearns, T.** (2021). Hedgehog signaling and the primary cilium: Implications for spatial and  
1012 temporal constraints on signaling. *Dev.* **148**, dev195552.
- 1013 **Huangfu, D. and Anderson, K. V.** (2005). Cilia and Hedgehog responsiveness in the mouse. *Proc. Natl.*  
1014 *Acad. Sci. U. S. A.* **102**, 11325–11330.
- 1015 **Kim, J., Tang, J. Y., Gong, R., Kim, J., Lee, J. J., Clemons, K. V., Chong, C. R., Chang, K. S., Fereshteh, M.,**  
1016 **Gardner, D., et al.** (2010). Itraconazole, a Commonly Used Antifungal that Inhibits Hedgehog  
1017 Pathway Activity and Cancer Growth. *Cancer Cell* **17**, 388–399.
- 1018 **Liu, A., Wang, B. and Niswander, L. A.** (2005). Mouse intraflagellar transport proteins regulate both the  
1019 activator and repressor functions of Gli transcription factors. *Development* **132**, 3103–3111.
- 1020 **Lucker, B. F., Miller, M. S., Dziedzic, S. A., Blackmarr, P. T. and Cole, D. G.** (2010). Direct interactions of  
1021 intraflagellar transport complex B proteins IFT88, IFT52, and IFT46. *J. Biol. Chem.* **285**, 21508–  
1022 21518.
- 1023 **Matise, M. P., Lustig, M., Sakurai, T., Grumet, M. and Joyner, A. L.** (1999). Ventral midline cells are  
1024 required for the local control of commissural axon guidance in the mouse spinal cord. *Development*  
1025 **126**, 3649–3659.
- 1026 **Mauti, O., Sadhu, R., Gemayel, J., Gesemann, M. and Stoeckli, E. T.** (2006). Expression patterns of  
1027 plexins and neuropilins are consistent with cooperative and separate functions during neural  
1028 development. *BMC Dev. Biol.* **6**,.
- 1029 **Nawabi, H. and Castellani, V.** (2011). Axonal commissures in the central nervous system: How to cross  
1030 the midline? *Cell. Mol. Life Sci.* **68**, 2539–2553.
- 1031 **Nozawa, Y. I., Lin, C. and Chuang, P. T.** (2013). Hedgehog signaling from the primary cilium to the  
1032 nucleus: An emerging picture of ciliary localization, trafficking and transduction. *Curr. Opin. Genet.*  
1033 *Dev.* **23**, 429–437.
- 1034 **Okada, A., Charron, F., Morin, S., Shin, D. S., Wong, K., Fabre, P. J., Tessier-Lavigne, M. and McConnell,**  
1035 **S. K.** (2006). Boc is a receptor for sonic hedgehog in the guidance of commissural axons. *Nature*  
1036 **444**, 369–373.
- 1037 **Ou, Y., Ruan, Y., Cheng, M., Moser, J. J., Rattner, J. B. and van der Hoorn, F. A.** (2009). Adenylate  
1038 cyclase regulates elongation of mammalian primary cilia. *Exp. Cell Res.* **315**, 2802–2817.
- 1039 **Park, S. M., Jang, H. J. and Lee, J. H.** (2019). Roles of primary cilia in the developing brain. *Front. Cell.*  
1040 *Neurosci.* **13**, 218.
- 1041 **Parra, L. M. and Zou, Y.** (2010). Sonic hedgehog induces response of commissural axons to Semaphorin  
1042 repulsion during midline crossing. *Nat. Neurosci.* **13**, 29–35.
- 1043 **Peng, J., Fabre, P. J., Dolique, T., Swikert, S. M., Kermasson, L., Shimogori, T. and Charron, F.** (2018).  
1044 Sonic Hedgehog Is a Remotely Produced Cue that Controls Axon Guidance Trans-axonally at a  
1045 Midline Choice Point. *Neuron* **97**, 326-340.e4.
- 1046 **Reiter, J. F. and Leroux, M. R.** (2017). Genes and molecular pathways underpinning ciliopathies. *Nat.*



- 1047 *Rev. Mol. Cell Biol.* **18**, 533–547.
- 1048 **Romani, M., Mancini, F., Micalizzi, A., Poretti, A., Miccinilli, E., Accorsi, P., Avola, E., Bertini, E.,**  
1049 **Borgatti, R., Romaniello, R., et al.** (2015). Oral-facial-digital syndrome type VI: is C5orf42 really the  
1050 major gene? *Hum. Genet.* **134**, 123–126.
- 1051 **Sattar, S. and Gleeson, J. G.** (2011). The ciliopathies in neuronal development: A clinical approach to  
1052 investigation of Joubert syndrome and Joubert syndrome-related disorders. *Dev. Med. Child*  
1053 *Neurol.* **53**, 793–798.
- 1054 **Schindelin, J., Arganda-Carreras, I., Frise, E., Kaynig, V., Longair, M., Pietzsch, T., Preibisch, S., Rueden,**  
1055 **C., Saalfeld, S., Schmid, B., et al.** (2012). Fiji: An open-source platform for biological-image analysis.  
1056 *Nat. Methods* **9**, 676–682.
- 1057 **Stoeckli, E. T.** (2018). Understanding axon guidance: Are we nearly there yet? *Dev.* **145**, dev151415.
- 1058 **Stoeckli, E. T. and Landmesser, L. T.** (1995). Axonin-1, Nr-CAM, and Ng-CAM play different roles in the  
1059 vivo guidance of chick commissural neurons. *Neuron* **14**, 1165–1179.
- 1060 **Suciu, S. K. and Caspary, T.** (2021). Cilia, neural development and disease. *Semin. Cell Dev. Biol.* **110**, 34–  
1061 42.
- 1062 **Tadenev, A. L. D., Kulaga, H. M., May-Simera, H. L., Kelley, M. W., Katsanis, N. and Reed, R. R.** (2011).  
1063 Loss of Bardet - Biedl syndrome protein-8 (BBS8) perturbs olfactory function, protein localization,  
1064 and axon targeting. *Proc. Natl. Acad. Sci. U. S. A.* **108**, 10320–10325.
- 1065 **Tasouri, E. and Tucker, K. L.** (2011). Primary cilia and organogenesis: Is Hedgehog the only sculptor? *Cell*  
1066 *Tissue Res.* **345**, 21–40.
- 1067 **Toro-Tapia, G. and Das, R. M.** (2020). Primary cilium remodeling mediates a cell signaling switch in  
1068 differentiating neurons. *Sci. Adv.* **6**, eabb0601.
- 1069 **Valente, E. M., Rosti, R. O., Gibbs, E. and Gleeson, J. G.** (2014). Primary cilia in neurodevelopmental  
1070 disorders. *Nat. Rev. Neurol.* **10**, 27–36.
- 1071 **Willaredt, M. A., Hasenpusch-Theil, K., Gardner, H. A. R., Kitanovic, I., Hirschfeld-Warneken, V. C.,**  
1072 **Gojak, C. P., Gorgas, K., Bradford, C. L., Spatz, J., Wölfel, S., et al.** (2008). A crucial role for primary  
1073 cilia in cortical morphogenesis. *J. Neurosci.* **28**, 12887–12900.
- 1074 **Wilson, N. H. and Stoeckli, E. T.** (2011). Cell type specific, traceable gene silencing for functional gene  
1075 analysis during vertebrate neural development. *Nucleic Acids Res.* **39**, e133.
- 1076 **Wilson, N. H. and Stoeckli, E. T.** (2012). In ovo electroporation of miRNA-based plasmids in the  
1077 developing neural tube and assessment of phenotypes by Dil injection in open-book preparations.  
1078 *J. Vis. Exp.* 4384.
- 1079 **Wilson, N. H. and Stoeckli, E. T.** (2013). Sonic Hedgehog regulates its own receptor on postcrossing  
1080 commissural axons in a glypican1-dependent manner. *Neuron* **79**, 478–491.
- 1081 **Yam, P. T., Langlois, S. D., Morin, S. and Charron, F.** (2009). Sonic Hedgehog Guides Axons through a  
1082 Noncanonical, Src-Family-Kinase-Dependent Signaling Pathway. *Neuron* **62**, 349–362.
- 1083 **Yam, P. T., Kent, C. B., Morin, S., Farmer, W. T., Alchini, R., Lepelletier, L., Colman, D. R., Tessier-**  
1084 **Lavigne, M., Fournier, A. E. and Charron, F.** (2012). 14-3-3 Proteins Regulate a Cell-Intrinsic Switch  
1085 from Sonic Hedgehog-Mediated Commissural Axon Attraction to Repulsion after Midline Crossing.  
1086 *Neuron* **76**, 735–749.
- 1087 **Yusifov, E., Dumoulin, A. and Stoeckli, E. T.** (2021). Investigating primary cilia during peripheral nervous  
1088 system formation. *Int. J. Mol. Sci.* **22**, 1–20.
- 1089 **Zuñiga, N. R. and Stoeckli, E. T.** (2017). Sonic hedgehog-'Jack-of-all-trades' in neural circuit formation. *J.*  
1090 *Dev. Biol.* **5**, 2.
- 1091
- 1092

1093

1094 **Movie S1. Smo blockade with Cyclopamine induced aberrant dl1 axon guidance at the**  
1095 **contralateral floorplate border.**

1096 Twenty four hours time-lapse recording of the ventral midline of *ex vivo* spinal cords culture  
1097 showing Math1::tdTomato-F-positive dl1 axons (black) at the contralateral floorplate border in  
1098 an ethanol-treated control or Cyclopamine-treated sample. dl1 axons turned rostrally in an  
1099 organized manner in the control, but many of them showed aberrant trajectories in the  
1100 longitudinal axis in the presence of Cyclopamine. Maximum projections of z-stacks taken every  
1101 15 minutes are represented. EtOH, ethanol; Cyclop., Cyclopamine. Rostral is up.

1102

1103 **Movie S2. Smo blockade with Cyclopamine induced aberrant dl1 axon guidance at the**  
1104 **contralateral floorplate border.**

1105 Twenty four hours time-lapse recording of the ventral midline of *ex vivo* spinal cords showing  
1106 Math1::tdTomato-F-positive dl1 axons (black) at the contralateral floorplate border in a  
1107 Cyclopamine-treated sample. Axons that were crossing or about to exit the floorplate (filled  
1108 arrowheads) at the beginning of the recording/inhibition showed a normal trajectory with a  
1109 rostral turn. However, most of the axons that showed an aberrant guidance phenotype at the  
1110 floorplate exit site (open arrowheads) were not yet in the floorplate at the time when the  
1111 inhibitors were added to the medium. Cyclop., Cyclopamine. Rostral is up.

1112

1113 **Movie S3. Blockade of Smo entry into the cilium with Itraconazole induced aberrant dl1 axon**  
1114 **guidance at the contralateral floorplate border**

1115 Twenty four hours time-lapse recording of the ventral midline of *ex vivo* spinal cords showing  
1116 Math1::tdTomato-F-positive dl1 axons (black) at the contralateral floorplate border in an DSMO-  
1117 treated control or Itraconazole-treated sample. dl1 axons turned rostrally in an organized  
1118 manner in the control, but many of them showed an aberrant trajectory in the longitudinal axis  
1119 in the presence of Itraconazole. Maximum projections of z-stacks taken every 15 minutes are  
1120 represented. Itracon., Itraconazole. Rostral is up.

1121

1122
